# Supplementary material for: Characterization of the Three New Kayviruses and Their Lytic Activity Against Multidrug-Resistant Staphylococcus aureus
Source: PubMed Central journal article supplement (PMC6843549; doi:10.3390/microorganisms7100471), 2019-10-18
Supplement: microorganisms-07-00471-s001.pdf [file microorganisms-07-00471-s001.pdf]

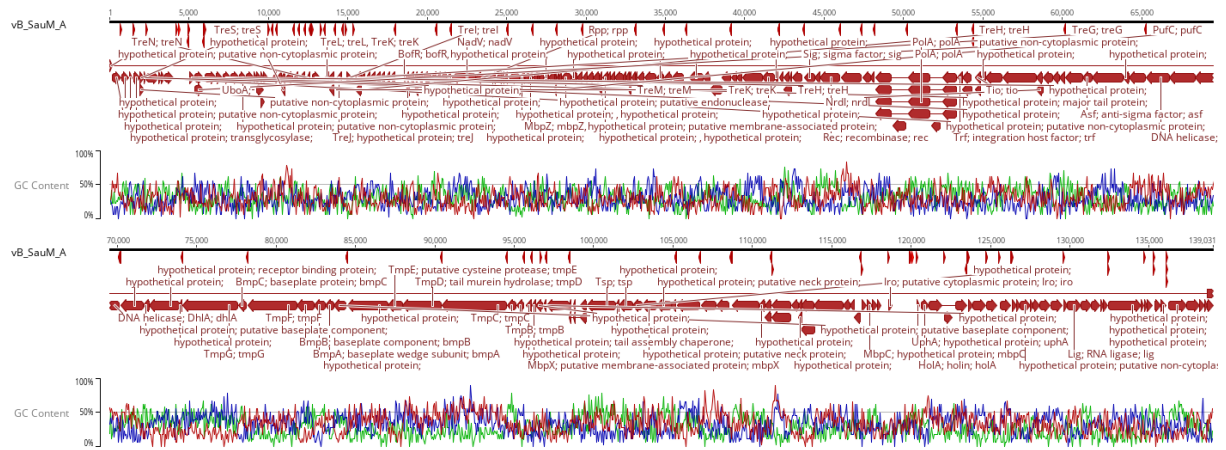

Figure S1. Genome organization of bacteriophage vB\_SauM\_A

Table S1. Genome annotation of bacteriophage vB\_SauM\_A

| Name                                                  | gene             | product                                    | Type | Minimum | Maximum | Length | # Intervals | Direction |
|-------------------------------------------------------|------------------|--------------------------------------------|------|---------|---------|--------|-------------|-----------|
| anti-sigma factor CDS; asf CDS                        | asf              | Asf; anti-sigma factor                     | CDS  | 61315   | 61911   | 597    | 1           | Reverse   |
| baseplate wedge subunit CDS; bmpA CDS                 | bmpA             | BmpA; baseplate wedge subunit              | CDS  | 82385   | 83089   | 705    | 1           | Reverse   |
| baseplate component CDS; bmpB CDS                     | bmpB             | BmpB; baseplate component                  | CDS  | 81324   | 82370   | 1047   | 1           | Reverse   |
| baseplate protein CDS; bmpC CDS                       | bmpC             | BmpC; baseplate protein                    | CDS  | 77612   | 78133   | 522    | 1           | Reverse   |
| bofL CDS; putative non-cytoplasmic protein CDS        | bofL             | BofL; putative non-cytoplasmic protein     | CDS  | 9704    | 9940    | 237    | 1           | Forward   |
| bofR CDS                                              | bofR             | BofR                                       | CDS  | 18530   | 18631   | 102    | 1           | Reverse   |
| dmcA CDS; putative membrane-associated protein CDS    | dmcA             | DmcA; putative membrane-associated protein | CDS  | 117559  | 117891  | 333    | 1           | Forward   |
| dmcB CDS; virion component CDS                        | dmcB             | DmcB; virion component                     | CDS  | 117904  | 118113  | 210    | 1           | Forward   |
| dmd CDS; putative cytoplasmic protein CDS             | dmd              | Dmd; putative cytoplasmic protein          | CDS  | 116138  | 116416  | 279    | 1           | Reverse   |
| DNA helicase CDS; dhIA CDS                            | dhIA             | DNA helicase; DhIA                         | CDS  | 68383   | 70131   | 1749   | 1           | Reverse   |
| DNA helicase CDS; dhIB CDS                            | dhIB             | DNA helicase; DhIB                         | CDS  | 65323   | 66765   | 1443   | 1           | Reverse   |
| DNA polymerase I CDS                                  |                  | DNA polymerase I                           | CDS  | 48237   | 53335   | 3219   | 3           | Reverse   |
| DNA polymerase I CDS                                  |                  | DNA polymerase I                           | CDS  | 48237   | 53335   | 3219   | 3           | Reverse   |
| DUF1024 domain protein CDS                            |                  | DUF1024 domain protein                     | CDS  | 9273    | 9527    | 255    | 1           | Forward   |
| hmzG CDS; putative NTP pyrophosphohydrolase CDS       | hmzG             | HmzG; putative NTP pyrophosphohydrolase    | CDS  | 134893  | 135195  | 303    | 1           | Forward   |
| HNH endonuclease CDS; ksaI CDS                        | ksaI             | HNH endonuclease; KsaI                     | CDS  | 122090  | 122590  | 501    | 1           | Forward   |
| HNH homing endonuclease CDS; I-KsaIII CDS; ksaIII CDS | I-KsaIII; ksaIII | HNH homing endonuclease; HnhC; KsaIII      | CDS  | 49331   | 50140   | 810    | 1           | Reverse   |
| holA CDS; holin CDS                                   | holA             | HolA; holin                                | CDS  | 120624  | 121127  | 504    | 1           | Forward   |
| hypothetical protein CDS                              |                  | hypothetical protein                       | CDS  | 138639  | 139031  | 393    | 1           | Forward   |
| hypothetical protein CDS                              |                  | hypothetical protein                       | CDS  | 137346  | 138191  | 846    | 1           | Forward   |
| hypothetical protein CDS                              |                  | hypothetical protein                       | CDS  | 136216  | 137334  | 1119   | 1           | Forward   |
| hypothetical protein CDS                              |                  | hypothetical protein                       | CDS  | 135737  | 136063  | 327    | 1           | Forward   |
| hypothetical protein CDS                              |                  | hypothetical protein                       | CDS  | 132452  | 134500  | 2049   | 1           | Forward   |
| hypothetical protein CDS                              |                  | hypothetical protein                       | CDS  | 113085  | 113906  | 822    | 1           | Reverse   |
| hypothetical protein CDS                              |                  | hypothetical protein                       | CDS  | 112925  | 113107  | 183    | 1           | reverse   |
| hypothetical protein CDS                              |                  | hypothetical protein                       | CDS  | 110417  | 110788  | 372    | 1           | reverse   |
| hypothetical protein CDS                              |                  | hypothetical protein                       | CDS  | 106786  | 107736  | 951    | 1           | reverse   |
| hypothetical protein CDS                              |                  | hypothetical protein                       | CDS  | 104891  | 105187  | 297    | 1           | reverse   |
| hypothetical protein CDS                              |                  | hypothetical protein                       | CDS  | 102458  | 103078  | 621    | 1           | reverse   |
| hypothetical protein CDS                              |                  | hypothetical protein                       | CDS  | 101603  | 102439  | 837    | 1           | reverse   |

|                          |  |                      |     |        |        |      |   |         |
|--------------------------|--|----------------------|-----|--------|--------|------|---|---------|
| hypothetical protein CDS |  | hypothetical protein | CDS | 101386 | 101601 | 216  | 1 | reverse |
| hypothetical protein CDS |  | hypothetical protein | CDS | 96845  | 96985  | 141  | 1 | reverse |
| hypothetical protein CDS |  | hypothetical protein | CDS | 96344  | 96802  | 459  | 1 | reverse |
| hypothetical protein CDS |  | hypothetical protein | CDS | 95744  | 96055  | 312  | 1 | reverse |
| hypothetical protein CDS |  | hypothetical protein | CDS | 84511  | 87057  | 2547 | 1 | reverse |
| hypothetical protein CDS |  | hypothetical protein | CDS | 83089  | 83613  | 525  | 1 | reverse |
| hypothetical protein CDS |  | hypothetical protein | CDS | 73926  | 74084  | 159  | 1 | reverse |
| hypothetical protein CDS |  | hypothetical protein | CDS | 70223  | 71599  | 1377 | 1 | reverse |
| hypothetical protein CDS |  | hypothetical protein | CDS | 66758  | 68371  | 1614 | 1 | reverse |
| hypothetical protein CDS |  | hypothetical protein | CDS | 63830  | 64207  | 378  | 1 | reverse |
| hypothetical protein CDS |  | hypothetical protein | CDS | 59828  | 60166  | 339  | 1 | reverse |
| hypothetical protein CDS |  | hypothetical protein | CDS | 59376  | 59828  | 453  | 1 | reverse |
| hypothetical protein CDS |  | hypothetical protein | CDS | 54833  | 55162  | 330  | 1 | reverse |
| hypothetical protein CDS |  | hypothetical protein | CDS | 53726  | 54322  | 597  | 1 | reverse |
| hypothetical protein CDS |  | hypothetical protein | CDS | 53726  | 54286  | 561  | 1 | reverse |
| hypothetical protein CDS |  | hypothetical protein | CDS | 47926  | 48168  | 243  | 1 | reverse |
| hypothetical protein CDS |  | hypothetical protein | CDS | 47427  | 47909  | 483  | 1 | reverse |
| hypothetical protein CDS |  | hypothetical protein | CDS | 46069  | 47340  | 1272 | 1 | reverse |
| hypothetical protein CDS |  | hypothetical protein | CDS | 44396  | 44749  | 354  | 1 | reverse |
| hypothetical protein CDS |  | hypothetical protein | CDS | 41854  | 42114  | 261  | 1 | reverse |
| hypothetical protein CDS |  | hypothetical protein | CDS | 41095  | 41850  | 756  | 1 | reverse |
| hypothetical protein CDS |  | hypothetical protein | CDS | 38572  | 39108  | 537  | 1 | reverse |
| hypothetical protein CDS |  | hypothetical protein | CDS | 37812  | 38579  | 768  | 1 | reverse |
| hypothetical protein CDS |  | hypothetical protein | CDS | 37388  | 37834  | 447  | 1 | reverse |
| hypothetical protein CDS |  | hypothetical protein | CDS | 36525  | 37388  | 864  | 1 | reverse |
| hypothetical protein CDS |  | hypothetical protein | CDS | 35422  | 36153  | 732  | 1 | reverse |
| hypothetical protein CDS |  | hypothetical protein | CDS | 34946  | 35404  | 459  | 1 | reverse |
| hypothetical protein CDS |  | hypothetical protein | CDS | 34438  | 34881  | 444  | 1 | reverse |
| hypothetical protein CDS |  | hypothetical protein | CDS | 33717  | 34421  | 705  | 1 | reverse |
| hypothetical protein CDS |  | hypothetical protein | CDS | 32868  | 33110  | 243  | 1 | reverse |
| hypothetical protein CDS |  | hypothetical protein | CDS | 32702  | 32863  | 162  | 1 | reverse |
| hypothetical protein CDS |  | hypothetical protein | CDS | 31347  | 31523  | 177  | 1 | reverse |
| hypothetical protein CDS |  | hypothetical protein | CDS | 31058  | 31354  | 297  | 1 | reverse |
| hypothetical protein CDS |  | hypothetical protein | CDS | 30447  | 30815  | 369  | 1 | reverse |
| hypothetical protein CDS |  | hypothetical protein | CDS | 30087  | 30434  | 348  | 1 | reverse |
| hypothetical protein CDS |  | hypothetical protein | CDS | 29434  | 29739  | 306  | 1 | reverse |
| hypothetical protein CDS |  | hypothetical protein | CDS | 29069  | 29419  | 351  | 1 | reverse |
| hypothetical protein CDS |  | hypothetical protein | CDS | 28274  | 28453  | 180  | 1 | reverse |
| hypothetical protein CDS |  | hypothetical protein | CDS | 28047  | 28145  | 99   | 1 | reverse |
| hypothetical protein CDS |  | hypothetical protein | CDS | 27351  | 27644  | 294  | 1 | reverse |
| hypothetical protein CDS |  | hypothetical protein | CDS | 26133  | 26396  | 264  | 1 | reverse |
| hypothetical protein CDS |  | hypothetical protein | CDS | 25813  | 26130  | 318  | 1 | reverse |
| hypothetical protein CDS |  | hypothetical protein | CDS | 25132  | 25812  | 681  | 1 | reverse |
| hypothetical protein CDS |  | hypothetical protein | CDS | 24650  | 24850  | 201  | 1 | reverse |
| hypothetical protein CDS |  | hypothetical protein | CDS | 23959  | 24267  | 309  | 1 | reverse |
| hypothetical protein CDS |  | hypothetical protein | CDS | 21243  | 21488  | 246  | 1 | reverse |

|                                                                    |  |                                                            |     |        |        |      |   |         |
|--------------------------------------------------------------------|--|------------------------------------------------------------|-----|--------|--------|------|---|---------|
| hypothetical protein CDS                                           |  | hypothetical protein                                       | CDS | 20831  | 21223  | 393  | 1 | reverse |
| hypothetical protein CDS                                           |  | hypothetical protein                                       | CDS | 20608  | 20829  | 222  | 1 | reverse |
| hypothetical protein CDS                                           |  | hypothetical protein                                       | CDS | 20231  | 20542  | 312  | 1 | reverse |
| hypothetical protein CDS                                           |  | hypothetical protein                                       | CDS | 19719  | 20228  | 510  | 1 | reverse |
| hypothetical protein CDS                                           |  | hypothetical protein                                       | CDS | 19388  | 19717  | 330  | 1 | reverse |
| hypothetical protein CDS                                           |  | hypothetical protein                                       | CDS | 19188  | 19397  | 210  | 1 | reverse |
| hypothetical protein CDS                                           |  | hypothetical protein                                       | CDS | 19188  | 19382  | 195  | 1 | reverse |
| hypothetical protein CDS                                           |  | hypothetical protein                                       | CDS | 18850  | 19164  | 315  | 1 | reverse |
| hypothetical protein CDS                                           |  | hypothetical protein                                       | CDS | 18668  | 18856  | 189  | 1 | reverse |
| hypothetical protein CDS                                           |  | hypothetical protein                                       | CDS | 18668  | 18835  | 168  | 1 | reverse |
| hypothetical protein CDS                                           |  | hypothetical protein                                       | CDS | 9534   | 9713   | 180  | 1 | forward |
| hypothetical protein CDS                                           |  | hypothetical protein                                       | CDS | 9534   | 9704   | 171  | 1 | forward |
| hypothetical protein CDS                                           |  | hypothetical protein                                       | CDS | 7117   | 7605   | 489  | 1 | forward |
| hypothetical protein CDS                                           |  | hypothetical protein                                       | CDS | 5348   | 5902   | 555  | 1 | forward |
| hypothetical protein CDS                                           |  | hypothetical protein                                       | CDS | 2170   | 2274   | 105  | 1 | forward |
| hypothetical protein CDS                                           |  | hypothetical protein                                       | CDS | 1910   | 2158   | 249  | 1 | forward |
| hypothetical protein CDS                                           |  | hypothetical protein                                       | CDS | 1256   | 1429   | 174  | 1 | forward |
| hypothetical protein CDS                                           |  | hypothetical protein                                       | CDS | 733    | 1215   | 483  | 1 | forward |
| hypothetical protein CDS; major tail protein CDS                   |  | hypothetical protein; major tail protein                   | CDS | 5015   | 5332   | 318  | 1 | forward |
| hypothetical protein CDS; nucleoside 2-deoxyribosyltransferase CDS |  | hypothetical protein; nucleoside 2-deoxyribosyltransferase | CDS | 130717 | 131343 | 627  | 1 | forward |
| hypothetical protein CDS; nucleotidyl transferase CDS              |  | hypothetical protein; nucleotidyl transferase              | CDS | 7617   | 8159   | 543  | 1 | forward |
| hypothetical protein CDS; peptidoglycan binding protein CDS        |  | hypothetical protein; peptidoglycan binding protein        | CDS | 131921 | 132094 | 174  | 1 | forward |
| hypothetical protein CDS; putative baseplate component CDS         |  | hypothetical protein; putative baseplate component         | CDS | 83613  | 84404  | 792  | 1 | reverse |
| hypothetical protein CDS; putative baseplate component CDS         |  | hypothetical protein; putative baseplate component         | CDS | 71606  | 71980  | 375  | 1 | reverse |
| hypothetical protein CDS; putative capsid component CDS            |  | hypothetical protein; putative capsid component            | CDS | 42987  | 43619  | 633  | 1 | reverse |
| hypothetical protein CDS; putative cytoplasmic protein CDS         |  | hypothetical protein; putative cytoplasmic protein         | CDS | 126393 | 126620 | 228  | 1 | forward |
| hypothetical protein CDS; putative cytoplasmic protein CDS         |  | hypothetical protein; putative cytoplasmic protein         | CDS | 6706   | 7104   | 399  | 1 | forward |
| hypothetical protein CDS; putative cytoplasmic protein CDS         |  | hypothetical protein; putative cytoplasmic protein         | CDS | 3064   | 3258   | 195  | 1 | forward |
| hypothetical protein CDS; putative DNA repair exonuclease CDS      |  | hypothetical protein; putative DNA repair exonuclease      | CDS | 39852  | 41102  | 1251 | 1 | reverse |
| hypothetical protein CDS; putative endonuclease CDS                |  | hypothetical protein; putative endonuclease                | CDS | 28467  | 29069  | 603  | 1 | reverse |
| hypothetical protein CDS; putative HNH endonuclease CDS            |  | hypothetical protein; putative HNH endonuclease            | CDS | 124769 | 125404 | 636  | 1 | forward |
| hypothetical protein CDS; putative membrane-associated protein CDS |  | hypothetical protein; putative membrane-associated protein | CDS | 32699  | 32863  | 165  | 1 | reverse |
| hypothetical protein CDS; putative membrane-associated protein CDS |  | hypothetical protein; putative membrane-associated protein | CDS | 32533  | 32712  | 180  | 1 | reverse |
| hypothetical protein CDS; putative membrane-associated protein CDS |  | hypothetical protein; putative membrane-associated protein | CDS | 26667  | 26930  | 264  | 1 | reverse |
| hypothetical protein CDS; putative neck protein CDS                |  | hypothetical protein; putative neck protein                | CDS | 103970 | 104878 | 909  | 1 | reverse |
| hypothetical protein CDS; putative neck protein CDS                |  | hypothetical protein; putative neck protein                | CDS | 103078 | 103956 | 879  | 1 | reverse |
| hypothetical protein CDS; putative non-cytoplasmic protein CDS     |  | hypothetical protein; putative non-cytoplasmic protein     | CDS | 134705 | 134893 | 189  | 1 | forward |
| hypothetical protein CDS; putative non-cytoplasmic protein CDS     |  | hypothetical protein; putative non-cytoplasmic protein     | CDS | 134500 | 134661 | 162  | 1 | forward |
| hypothetical protein CDS; putative non-cytoplasmic protein CDS     |  | hypothetical protein; putative non-cytoplasmic protein     | CDS | 132111 | 132374 | 264  | 1 | forward |
| hypothetical protein CDS; putative non-cytoplasmic protein CDS     |  | hypothetical protein; putative non-cytoplasmic protein     | CDS | 127507 | 127698 | 192  | 1 | forward |
| hypothetical protein CDS; putative non-cytoplasmic protein CDS     |  | hypothetical protein; putative non-cytoplasmic protein     | CDS | 126843 | 127484 | 642  | 1 | forward |

|                                                                    |                |                                                                            |     |        |         |      |   |         |
|--------------------------------------------------------------------|----------------|----------------------------------------------------------------------------|-----|--------|---------|------|---|---------|
| hypothetical protein CDS; putative non-cytoplasmic protein CDS     |                | hypothetical protein; putative non-cytoplasmic protein                     | CDS | 115731 | 116141  | 411  | 1 | reverse |
| hypothetical protein CDS; putative non-cytoplasmic protein CDS     |                | hypothetical protein; putative non-cytoplasmic protein                     | CDS | 112449 | 112928  | 480  | 1 | reverse |
| hypothetical protein CDS; putative non-cytoplasmic protein CDS     |                | hypothetical protein; putative non-cytoplasmic protein                     | CDS | 39172  | 39483   | 312  | 1 | reverse |
| hypothetical protein CDS; putative non-cytoplasmic protein CDS     |                | hypothetical protein; putative non-cytoplasmic protein                     | CDS | 8173   | 8604    | 432  | 1 | forward |
| hypothetical protein CDS; putative non-cytoplasmic protein CDS     |                | hypothetical protein; putative non-cytoplasmic protein                     | CDS | 3481   | 4029    | 549  | 1 | forward |
| hypothetical protein CDS; putative non-cytoplasmic protein CDS     |                | hypothetical protein; putative non-cytoplasmic protein                     | CDS | 3259   | 3477    | 219  | 1 | forward |
| hypothetical protein CDS; putative non-cytoplasmic protein CDS     |                | hypothetical protein; putative non-cytoplasmic protein                     | CDS | 2337   | 3074    | 738  | 1 | forward |
| hypothetical protein CDS; putative non-cytoplasmic protein CDS     |                | hypothetical protein; putative non-cytoplasmic protein                     | CDS | 141    | 683     | 543  | 1 | forward |
| hypothetical protein CDS; putative non-cytoplasmic protein CDS     |                | hypothetical protein; putative non-cytoplasmic protein                     | CDS | <1     | >139031 | >534 | 2 | forward |
| hypothetical protein CDS; putative nucleotide kinase CDS           |                | hypothetical protein; putative nucleotide kinase                           | CDS | 135328 | 135744  | 417  | 1 | forward |
| hypothetical protein CDS; putative transcription regulator CDS     |                | hypothetical protein; putative transcription regulator                     | CDS | 26920  | 27036   | 117  | 1 | reverse |
| hypothetical protein CDS; putative virion component CDS            |                | hypothetical protein; putative virion component                            | CDS | 128129 | 128743  | 615  | 1 | forward |
| hypothetical protein CDS; putative virion protein CDS              |                | hypothetical protein; putative virion protein                              | CDS | 113085 | 113885  | 801  | 1 | reverse |
| hypothetical protein CDS; receptor binding protein CDS             |                | hypothetical protein; receptor binding protein                             | CDS | 72003  | 73925   | 1923 | 1 | reverse |
| hypothetical protein CDS; resolvase CDS                            |                | hypothetical protein; resolvase                                            | CDS | 58781  | 59389   | 609  | 1 | reverse |
| hypothetical protein CDS; serine/threonine protein phosphatase CDS |                | hypothetical protein; serine/threonine protein phosphatase                 | CDS | 6002   | 6709    | 708  | 1 | forward |
| hypothetical protein CDS; tail assembly chaperone CDS              |                | hypothetical protein; tail assembly chaperone                              | CDS | 95154  | 95612   | 459  | 1 | reverse |
| hypothetical protein CDS; transcriptional regulator CDS            |                | hypothetical protein; transcriptional regulator                            | CDS | 126623 | 126853  | 231  | 1 | forward |
| hypothetical protein CDS; transglycosylase CDS                     |                | hypothetical protein; transglycosylase                                     | CDS | 1528   | 1917    | 390  | 1 | forward |
| I-KsaII CDS; ksaII CDS; putative endonuclease CDS                  | I-KsaII; ksaII | I-KsaII; KsaII; putative endonuclease                                      | CDS | 51785  | 52297   | 513  | 1 | reverse |
| Ioh CDS; putative group I intron-encoded nuclease CDS              | Ioh            | Ioh; putative group I intron-encoded nuclease                              | CDS | 97032  | 98435   | 1404 | 1 | reverse |
| Iro CDS; iro CDS; putative cytoplasmic protein CDS                 | Iro; iro       | Iro; putative cytoplasmic protein                                          | CDS | 118589 | 118807  | 219  | 1 | forward |
| RNA ligase CDS; lig CDS                                            | lig            | Lig; RNA ligase                                                            | CDS | 129828 | 130724  | 897  | 1 | forward |
| N-acetylmuramoyl-L-alanine amidase CDS; lysK CDS                   | lysK           | LysK; N-acetylmuramoyl-L-alanine amidase                                   | CDS | 121127 | 123490  | 1488 | 2 | forward |
| mbpA CDS; putative membrane-associated protein CDS                 | mbpA           | MbpA; putative membrane protein MbpA; putative membrane-associated protein | CDS | 8597   | 9082    | 486  | 1 | forward |
| mbpB CDS; putative membrane-associated protein CDS                 | mbpB           | MbpB; putative membrane-associated protein                                 | CDS | 131336 | 131914  | 579  | 1 | forward |
| hypothetical protein CDS; mbpC CDS                                 | mbpC           | MbpC; hypothetical protein                                                 | CDS | 117220 | 117546  | 327  | 1 | forward |
| mbpD CDS; putative membrane-associated protein CDS                 | mbpD           | MbpD; putative membrane protein MbpD; putative membrane-associated protein | CDS | 116394 | 116780  | 387  | 1 | reverse |
| mbpE CDS                                                           | mbpE           | MbpE; putative membrane protein MbpE                                       | CDS | 110806 | 111156  | 351  | 1 | reverse |
| mbpF CDS; putative membrane-associated protein CDS                 | mbpF           | MbpF; putative membrane-associated protein; putative membrane protein MbpF | CDS | 111232 | 112407  | 1176 | 1 | reverse |
| hypothetical protein CDS; mbpG CDS                                 | mbpG           | MbpG; hypothetical protein; putative membrane protein MbpG                 | CDS | 39470  | 39838   | 369  | 1 | reverse |
| mbpH CDS; putative membrane-associated protein CDS                 | mbpH           | MbpH; putative membrane protein MbpH; putative membrane-associated protein | CDS | 33257  | 33655   | 399  | 1 | reverse |
| mbpI CDS; putative membrane-associated protein CDS                 | mbpI           | MbpI; putative membrane protein MbpI; putative membrane-associated protein | CDS | 29809  | 30087   | 279  | 1 | reverse |
| mbpJ CDS; putative membrane-associated protein CDS                 | mbpJ           | MbpJ; putative membrane protein MbpJ; putative membrane-associated protein | CDS | 31798  | 32331   | 534  | 1 | reverse |
| mbpK CDS                                                           | mbpK           | MbpK; putative membrane protein MbpK                                       | CDS | 30828  | 31019   | 192  | 1 | reverse |
| mbpP CDS                                                           | mbpP           | MbpP; putative membrane protein MbpP                                       | CDS | 138472 | 138636  | 165  | 1 | forward |
| mbpR CDS                                                           | mbpR           | MbpR                                                                       | CDS | 138191 | 138469  | 279  | 1 | forward |
| mbpS CDS; prohibitin domain membrane protein CDS                   | mbpS           | MbpS; prohibitin domain membrane protein; putative membrane protein MbpS   | CDS | 123911 | 124702  | 792  | 1 | forward |
| mbpT CDS; putative membrane-associated protein CDS                 | mbpT           | MbpT; putative membrane-associated protein                                 | CDS | 9079   | 9270    | 192  | 1 | forward |

|                                                                      |      |                                                                      |     |        |        |      |   |         |
|----------------------------------------------------------------------|------|----------------------------------------------------------------------|-----|--------|--------|------|---|---------|
| <b>mbpU CDS; putative membrane-associated protein CDS</b>            | mbpU | MbpU; putative membrane-associated protein                           | CDS | 129604 | 129828 | 225  | 1 | forward |
| <b>mbpV CDS; putative membrane-associated protein CDS</b>            | mbpV | MbpV; putative membrane-associated protein                           | CDS | 123603 | 123911 | 309  | 1 | forward |
| <b>mbpW CDS; putative membrane-associated protein CDS</b>            | mbpW | MbpW; putative membrane-associated protein                           | CDS | 116921 | 117187 | 267  | 1 | forward |
| <b>mbpX CDS; putative membrane-associated protein CDS</b>            | mbpX | MbpX; putative membrane-associated protein                           | CDS | 96137  | 96331  | 195  | 1 | reverse |
| <b>mbpY CDS; putative membrane-associated protein CDS</b>            | mbpY | MbpY; putative membrane-associated protein                           | CDS | 31535  | 31783  | 249  | 1 | reverse |
| <b>mbpZ CDS</b>                                                      | mbpZ | MbpZ                                                                 | CDS | 26411  | 26590  | 180  | 1 | reverse |
| <b>major capsid protein CDS; mcp CDS</b>                             | mcp  | Mcp; major capsid protein                                            | CDS | 105279 | 106670 | 1392 | 1 | reverse |
| <b>nadV CDS</b>                                                      | nadV | NadV                                                                 | CDS | 21567  | 23036  | 1470 | 1 | reverse |
| <b>nrdF CDS; putative ribonucleotide reductase minor subunit CDS</b> | nrdF | NrdF; putative ribonucleotide reductase minor subunit                | CDS | 55180  | 56229  | 1050 | 1 | reverse |
| <b>nrdI CDS</b>                                                      | nrdI | NrdI                                                                 | CDS | 58372  | 58803  | 432  | 1 | reverse |
| <b>phosphate starvation-inducible protein CDS; phr CDS</b>           | phr  | Phr; phosphate starvation-inducible protein                          | CDS | 128795 | 129535 | 741  | 1 | forward |
| <b>polA CDS</b>                                                      | polA | PolA                                                                 | CDS | 48237  | 53335  | 3219 | 3 | reverse |
| <b>polA CDS</b>                                                      | polA | PolA                                                                 | CDS | 48237  | 53335  | 3219 | 3 | reverse |
| <b>pri CDS; DNA primase CDS</b>                                      | pri  | Pri; DNA primase                                                     | CDS | 60233  | 61300  | 1068 | 1 | reverse |
| <b>pro CDS; prohead protease CDS</b>                                 | pro  | Pro; prohead protease                                                | CDS | 107755 | 108528 | 774  | 1 | reverse |
| <b>portal protein CDS; prt CDS</b>                                   | prt  | Prt; portal protein                                                  | CDS | 108722 | 110413 | 1692 | 1 | reverse |
| <b>hypothetical protein CDS; pufA CDS</b>                            | pufA | PufA; hypothetical protein                                           | CDS | 33178  | 33240  | 63   | 1 | reverse |
| <b>pufB CDS</b>                                                      | pufB | PufB                                                                 | CDS | 28202  | 28270  | 69   | 1 | reverse |
| <b>pufC CDS</b>                                                      | pufC | PufC                                                                 | CDS | 28064  | 28138  | 75   | 1 | reverse |
| <b>putative capsid component CDS</b>                                 |      | putative capsid component                                            | CDS | 42857  | 42973  | 117  | 1 | reverse |
| <b>putative capsid component CDS</b>                                 |      | putative capsid component                                            | CDS | 42452  | 42772  | 321  | 1 | reverse |
| <b>mbpF CDS</b>                                                      | mbpF | putative membrane protein MbpF                                       | CDS | 111220 | 112407 | 1188 | 1 | reverse |
| <b>mbpL CDS; putative membrane-associated protein CDS</b>            | mbpL | putative membrane protein MbpL; putative membrane-associated protein | CDS | 27047  | 27334  | 288  | 1 | reverse |
| <b>mbpM CDS; putative membrane-associated protein CDS</b>            | mbpM | putative membrane protein MbpM; putative membrane-associated protein | CDS | 27646  | 28047  | 402  | 1 | reverse |
| <b>mbpN CDS</b>                                                      | mbpN | putative membrane protein MbpN                                       | CDS | 24885  | 25043  | 159  | 1 | reverse |
| <b>mbpO CDS</b>                                                      | mbpO | putative membrane protein MbpO                                       | CDS | 24359  | 24649  | 291  | 1 | reverse |
| <b>putative membrane-associated protein CDS</b>                      |      | putative membrane-associated protein                                 | CDS | 112925 | 113098 | 174  | 1 | reverse |
| <b>putative membrane-associated protein CDS</b>                      |      | putative membrane-associated protein                                 | CDS | 110806 | 111147 | 342  | 1 | reverse |
| <b>putative membrane-associated protein CDS</b>                      |      | putative membrane-associated protein                                 | CDS | 30828  | 31010  | 183  | 1 | reverse |
| <b>putative non-cytoplasmic protein CDS</b>                          |      | putative non-cytoplasmic protein                                     | CDS | 5351   | 5902   | 552  | 1 | forward |
| <b>putative non-cytoplasmic protein CDS</b>                          |      | putative non-cytoplasmic protein                                     | CDS | 1919   | 2158   | 240  | 1 | forward |
| <b>putative ribonucleotide reductase large subunit CDS; nrdE CDS</b> | nrdE | putative ribonucleotide reductase large subunit; NrdE                | CDS | 56243  | 58357  | 2115 | 1 | reverse |
| <b>rbn CDS; ribonuclease H CDS</b>                                   | rbn  | Rbn; ribonuclease H                                                  | CDS | 127688 | 128113 | 426  | 1 | forward |
| <b>rec CDS; recombinase CDS</b>                                      | rec  | Rec; recombinase                                                     | CDS | 44753  | 46009  | 1257 | 1 | reverse |
| <b>ribonucleotide reductase stimulatory protein CDS</b>              |      | ribonucleotide reductase stimulatory protein                         | CDS | 58372  | 58764  | 393  | 1 | reverse |
| <b>recombination-related endonuclease CDS; rncA CDS</b>              | rncA | RncA; recombination-related endonuclease                             | CDS | 64207  | 65244  | 1038 | 1 | reverse |
| <b>recombination-related endonuclease CDS; rncB CDS</b>              | rncB | RncB; recombination-related endonuclease                             | CDS | 61911  | 63830  | 1920 | 1 | reverse |
| <b>rpp CDS</b>                                                       | rpp  | Rpp                                                                  | CDS | 23054  | 23962  | 909  | 1 | reverse |
| <b>hypothetical protein CDS; sci CDS</b>                             | sci  | Sci; hypothetical protein                                            | CDS | 32321  | 32497  | 177  | 1 | reverse |
| <b>sig CDS; sigma factor CDS</b>                                     | sig  | Sig; sigma factor                                                    | CDS | 43747  | 44409  | 663  | 1 | reverse |
| <b>ter CDS; terminase large subunit CDS</b>                          | ter  | Ter; terminase large subunit                                         | CDS | 113899 | 115716 | 1818 | 1 | reverse |
| <b>lytic transglycosylase CDS; tgl CDS</b>                           | tgl  | Tgl; lytic transglycosylase                                          | CDS | 125591 | 126283 | 693  | 1 | forward |
| <b>tio CDS</b>                                                       | tio  | Tio                                                                  | CDS | 54529  | 54840  | 312  | 1 | reverse |
| <b>putative oxidoreductase CDS; tio CDS</b>                          | tio  | Tio; putative oxidoreductase                                         | CDS | 54529  | 54849  | 321  | 1 | reverse |
| <b>tail tube protein CDS; tmpA CDS</b>                               | tmpA | TmpA; tail tube protein                                              | CDS | 98534  | 99523  | 426  | 3 | reverse |

|                                                           |      |                                               |      |        |        |      |   |         |
|-----------------------------------------------------------|------|-----------------------------------------------|------|--------|--------|------|---|---------|
| tail tube protein CDS; tmpA CDS                           | tmpA | TmpA; tail tube protein                       | CDS  | 98534  | 99523  | 426  | 3 | reverse |
| tmpB CDS                                                  | tmpB | TmpB                                          | CDS  | 94574  | 95110  | 537  | 1 | reverse |
| tmpC CDS                                                  | tmpC | TmpC                                          | CDS  | 90463  | 94521  | 4059 | 1 | reverse |
| tail murein hydrolase CDS; tmpD CDS                       | tmpD | TmpD; tail murein hydrolase                   | CDS  | 87958  | 90384  | 2427 | 1 | reverse |
| putative cysteine protease CDS; tmpE CDS                  | tmpE | TmpE; putative cysteine protease              | CDS  | 87057  | 87944  | 888  | 1 | reverse |
| tmpF CDS                                                  | tmpF | TmpF                                          | CDS  | 78244  | 81303  | 3060 | 1 | reverse |
| tmpG CDS                                                  | tmpG | TmpG                                          | CDS  | 74133  | 77591  | 3459 | 1 | reverse |
| tmpH CDS                                                  | tmpH | TmpH                                          | CDS  | 42452  | 42964  | 513  | 1 | reverse |
| putative capsid component CDS; tail protein CDS; tmpI CDS | tmpI | TmpI; putative capsid component; tail protein | CDS  | 42210  | 42437  | 228  | 1 | reverse |
| treA CDS                                                  | treA | TreA                                          | CDS  | 17646  | 17945  | 300  | 1 | reverse |
| treB CDS                                                  | treB | TreB                                          | CDS  | 17445  | 17630  | 186  | 1 | reverse |
| treC CDS                                                  | treC | TreC                                          | CDS  | 17051  | 17338  | 288  | 1 | reverse |
| treD CDS                                                  | treD | TreD                                          | CDS  | 16725  | 17051  | 327  | 1 | reverse |
| treE CDS; hypothetical protein CDS                        | treE | TreE; hypothetical protein                    | CDS  | 16416  | 16709  | 294  | 1 | reverse |
| treF CDS                                                  | treF | TreF                                          | CDS  | 16155  | 16412  | 258  | 1 | reverse |
| treG CDS                                                  | treG | TreG                                          | CDS  | 15838  | 16077  | 240  | 1 | reverse |
| treH CDS                                                  | treH | TreH                                          | CDS  | 15480  | 15827  | 348  | 1 | reverse |
| treH CDS                                                  | treH | TreH                                          | CDS  | 15480  | 15824  | 345  | 1 | reverse |
| treI CDS                                                  | treI | TreI                                          | CDS  | 14933  | 15271  | 339  | 1 | forward |
| treJ CDS; hypothetical protein CDS                        | treJ | TreJ; hypothetical protein                    | CDS  | 14313  | 14621  | 309  | 1 | reverse |
| treK CDS                                                  | treK | TreK                                          | CDS  | 13824  | 14107  | 284  | 1 | reverse |
| treK CDS                                                  | treK | TreK                                          | CDS  | 13820  | 14107  | 288  | 1 | reverse |
| treL CDS                                                  | treL | TreL                                          | CDS  | 13579  | 13770  | 192  | 1 | reverse |
| treM CDS                                                  | treM | TreM                                          | CDS  | 12774  | 13262  | 489  | 1 | forward |
| treN CDS                                                  | treN | TreN                                          | CDS  | 12448  | 12606  | 159  | 1 | reverse |
| treP CDS; hypothetical protein CDS                        | treP | TreP; hypothetical protein                    | CDS  | 11957  | 12280  | 324  | 1 | reverse |
| hypothetical protein CDS; treQ CDS                        | treQ | TreQ; hypothetical protein                    | CDS  | 11621  | 11857  | 237  | 1 | reverse |
| putative non-cytoplasmic protein CDS; treR CDS            | treR | TreR; putative non-cytoplasmic protein        | CDS  | 11071  | 11541  | 471  | 1 | reverse |
| treS CDS                                                  | treS | TreS                                          | CDS  | 10839  | 11021  | 183  | 1 | reverse |
| hypothetical protein CDS; treS CDS                        | treS | TreS; hypothetical protein                    | CDS  | 10839  | 11012  | 174  | 1 | reverse |
| treT CDS; hypothetical protein CDS                        | treT | TreT; hypothetical protein                    | CDS  | 10570  | 10839  | 270  | 1 | reverse |
| hypothetical protein CDS; treU CDS                        | treU | TreU; hypothetical protein                    | CDS  | 10264  | 10485  | 222  | 1 | reverse |
| integration host factor CDS; trf CDS                      | trf  | Trf; integration host factor                  | CDS  | 53411  | 53716  | 306  | 1 | reverse |
| tRNA-Asp                                                  |      | tRNA-Asp                                      | tRNA | 119962 | 120035 | 74   | 1 | forward |
| tRNA-Met                                                  |      | tRNA-Met                                      | tRNA | 4309   | 4380   | 72   | 1 | forward |
| tRNA-Phe                                                  |      | tRNA-Phe                                      | tRNA | 120042 | 120114 | 73   | 1 | forward |
| tsp CDS                                                   | tsp  | Tsp                                           | CDS  | 99596  | 101359 | 1764 | 1 | reverse |
| UboA CDS                                                  |      | UboA                                          | CDS  | 9273   | 9704   | 432  | 1 | forward |
| hypothetical protein CDS; uphA CDS                        | uphA | UphA; hypothetical protein                    | CDS  | 120354 | 120539 | 186  | 1 | forward |

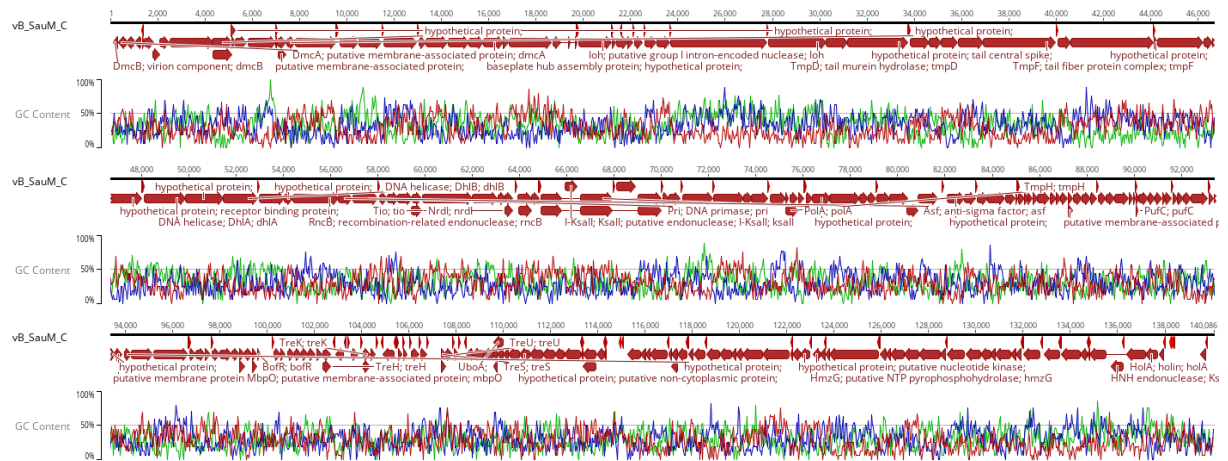

Figure S2. Genome organization of bacteriophage vB\_SauM\_C

Table S2. Genome annotation of bacteriophage vB\_SauM\_C

| Name                                               | gene | product                                    | Type | Minimum | Maximum | Length | # Intervals | Direction |
|----------------------------------------------------|------|--------------------------------------------|------|---------|---------|--------|-------------|-----------|
| hypothetical protein CDS; uphA CDS                 | uphA | UphA; hypothetical protein                 | CDS  | 137777  | 137962  | 186    | 1           | reverse   |
| UboC CDS; hypothetical protein CDS                 |      | UboC; hypothetical protein                 | CDS  | 108679  | 109164  | 486    | 1           | reverse   |
| UboB CDS; hypothetical protein CDS                 |      | UboB; hypothetical protein                 | CDS  | 109177  | 109584  | 408    | 1           | reverse   |
| UboA CDS                                           |      | UboA                                       | CDS  | 109584  | 110015  | 432    | 1           | reverse   |
| tsp CDS; tail sheath protein CDS                   | tsp  | Tsp; tail sheath protein                   | CDS  | 16866   | 18629   | 1764   | 1           | forward   |
| tRNA-Phe                                           |      | tRNA-Phe                                   | tRNA | 138202  | 138274  | 73     | 1           | reverse   |
| tRNA-Met                                           |      | tRNA-Met                                   | tRNA | 114908  | 114979  | 72     | 1           | reverse   |
| tRNA-Asp                                           |      | tRNA-Asp                                   | tRNA | 138281  | 138354  | 74     | 1           | reverse   |
| integration host factor CDS; trf CDS               | trf  | Trf; integration host factor               | CDS  | 64515   | 64820   | 306    | 1           | forward   |
| treU CDS                                           | treU | TreU                                       | CDS  | 107928  | 108107  | 180    | 1           | forward   |
| treT CDS; hypothetical protein CDS                 | treT | TreT; hypothetical protein                 | CDS  | 107574  | 107843  | 270    | 1           | forward   |
| hypothetical protein CDS; treS CDS                 | treS | TreS; hypothetical protein                 | CDS  | 107401  | 107574  | 174    | 1           | forward   |
| treS CDS                                           | treS | TreS                                       | CDS  | 107392  | 107574  | 183    | 1           | forward   |
| hypothetical protein CDS; treQ CDS                 | treQ | TreQ; hypothetical protein                 | CDS  | 106520  | 106756  | 237    | 1           | forward   |
| hypothetical protein CDS; treP CDS                 | treP | TreP; hypothetical protein                 | CDS  | 106097  | 106420  | 324    | 1           | forward   |
| hypothetical protein CDS; treO CDS                 | treO | TreO; hypothetical protein                 | CDS  | 105798  | 105929  | 132    | 1           | forward   |
| putative membrane-associated protein CDS; treN CDS | treN | TreN; putative membrane-associated protein | CDS  | 105570  | 105728  | 159    | 1           | forward   |
| hypothetical protein CDS; treL CDS                 | treL | TreL; hypothetical protein                 | CDS  | 104406  | 104597  | 192    | 1           | forward   |
| hypothetical protein CDS; treK CDS                 | treK | TreK; hypothetical protein                 | CDS  | 104069  | 104356  | 288    | 1           | forward   |
| treK CDS                                           | treK | TreK                                       | CDS  | 104069  | 104352  | 284    | 1           | forward   |
| hypothetical protein CDS; treJ CDS                 | treJ | TreJ; hypothetical protein                 | CDS  | 103555  | 103863  | 309    | 1           | forward   |
| hypothetical protein CDS; treI CDS                 | treI | TreI; hypothetical protein                 | CDS  | 102906  | 103244  | 339    | 1           | reverse   |
| hypothetical protein CDS; treH CDS                 | treH | TreH; hypothetical protein                 | CDS  | 102352  | 102699  | 348    | 1           | forward   |
| treH CDS                                           | treH | TreH                                       | CDS  | 102355  | 102699  | 345    | 1           | forward   |
| treG CDS; hypothetical protein CDS                 | treG | TreG; hypothetical protein                 | CDS  | 102102  | 102341  | 240    | 1           | forward   |
| hypothetical protein CDS; treF CDS                 | treF | TreF; hypothetical protein                 | CDS  | 101767  | 102024  | 258    | 1           | forward   |
| treE CDS; hypothetical protein CDS                 | treE | TreE; hypothetical protein                 | CDS  | 101470  | 101763  | 294    | 1           | forward   |
| hypothetical protein CDS; treD CDS                 | treD | TreD; hypothetical protein                 | CDS  | 101183  | 101470  | 288    | 1           | forward   |
| hypothetical protein CDS; treC CDS                 | treC | TreC; hypothetical protein                 | CDS  | 100893  | 101183  | 291    | 1           | forward   |
| putative transmembrane protein CDS; treB CDS       | treB | TreB; putative transmembrane protein       | CDS  | 100601  | 100786  | 186    | 1           | forward   |

|                                                                |      |                                                                            |     |        |        |      |   |         |
|----------------------------------------------------------------|------|----------------------------------------------------------------------------|-----|--------|--------|------|---|---------|
| putative non-cytoplasmic protein CDS; treA CDS                 | treA | TreA; putative non-cytoplasmic protein                                     | CDS | 100286 | 100585 | 300  | 1 | forward |
| tail protein CDS; tmpI CDS                                     | tmpI | TmpI; tail protein                                                         | CDS | 75794  | 76021  | 228  | 1 | forward |
| tmpH CDS                                                       | tmpH | TmpH                                                                       | CDS | 75267  | 75779  | 513  | 1 | forward |
| tmpG CDS; adsorption-associated tail protein CDS               | tmpG | TmpG; adsorption-associated tail protein                                   | CDS | 40640  | 44098  | 3459 | 1 | forward |
| tmpF CDS; tail fiber protein complex CDS                       | tmpF | TmpF; tail fiber protein complex                                           | CDS | 36928  | 39987  | 3060 | 1 | forward |
| putative cysteine protease CDS; tmpE CDS                       | tmpE | TmpE; putative cysteine protease                                           | CDS | 30281  | 31168  | 888  | 1 | forward |
| tail murein hydrolase CDS; tmpD CDS                            | tmpD | TmpD; tail murein hydrolase                                                | CDS | 27841  | 30267  | 2427 | 1 | forward |
| tmpC CDS; tape measure protein CDS                             | tmpC | TmpC; tape measure protein                                                 | CDS | 23704  | 27762  | 4059 | 1 | forward |
| tmpB CDS; tail morphogenetic protein CDS                       | tmpB | TmpB; tail morphogenetic protein                                           | CDS | 23115  | 23651  | 537  | 1 | forward |
| tail tube protein CDS; tmpA CDS                                | tmpA | TmpA; tail tube protein                                                    | CDS | 18702  | 19691  | 426  | 3 | forward |
| putative oxidoreductase CDS; tio CDS                           | tio  | Tio; putative oxidoreductase                                               | CDS | 63382  | 63702  | 321  | 1 | forward |
| tio CDS                                                        | tio  | Tio                                                                        | CDS | 63391  | 63702  | 312  | 1 | forward |
| lytic transglycosylase CDS; tgl CDS                            | tgl  | Tgl; lytic transglycosylase                                                | CDS | 132033 | 132725 | 693  | 1 | reverse |
| ter CDS; terminase large subunit CDS                           | ter  | Ter; terminase large subunit                                               | CDS | 2491   | 4308   | 1818 | 1 | forward |
| sig CDS; sigma factor CDS                                      | sig  | Sig; sigma factor                                                          | CDS | 73822  | 74484  | 663  | 1 | forward |
| hypothetical protein CDS; sci CDS                              | sci  | Sci; hypothetical protein                                                  | CDS | 85734  | 85910  | 177  | 1 | forward |
| ribose-phosphate pyrophosphokinase CDS; rpp CDS                | rpp  | Rpp; ribose-phosphate pyrophosphokinase                                    | CDS | 94269  | 95177  | 909  | 1 | forward |
| recombination-related endonuclease CDS; rncB CDS               | rncB | RncB; recombination-related endonuclease                                   | CDS | 54401  | 56320  | 1920 | 1 | forward |
| recombination-related endonuclease CDS; rncA CDS               | rncA | RncA; recombination-related endonuclease                                   | CDS | 52987  | 54024  | 1038 | 1 | forward |
| ribonucleotide reductase stimulatory protein CDS               |      | ribonucleotide reductase stimulatory protein                               | CDS | 59467  | 59859  | 393  | 1 | forward |
| rec CDS; recombinase CDS                                       | rec  | Rec; recombinase                                                           | CDS | 72222  | 73478  | 1257 | 1 | forward |
| rhn CDS; ribonuclease H CDS                                    | rhn  | Rhn; ribonuclease H                                                        | CDS | 130203 | 130628 | 426  | 1 | reverse |
| putative virion protein CDS; hypothetical protein CDS          |      | putative virion protein; hypothetical protein                              | CDS | 4322   | 5122   | 801  | 1 | forward |
| putative non-cytoplasmic protein CDS; hypothetical protein CDS |      | putative non-cytoplasmic protein; hypothetical protein                     | CDS | 119147 | 119680 | 534  | 1 | reverse |
| putative non-cytoplasmic protein CDS                           |      | putative non-cytoplasmic protein                                           | CDS | 117130 | 117369 | 240  | 1 | reverse |
| putative non-cytoplasmic protein CDS                           |      | putative non-cytoplasmic protein                                           | CDS | 113386 | 113937 | 552  | 1 | reverse |
| putative neck protein CDS; hypothetical protein CDS            |      | putative neck protein; hypothetical protein                                | CDS | 14269  | 15147  | 879  | 1 | forward |
| putative membrane-associated protein CDS; mbpP CDS             | mbpP | putative membrane-associated protein; MbpP; putative membrane protein MbpP | CDS | 119683 | 119847 | 165  | 1 | reverse |
| putative membrane-associated protein CDS                       |      | putative membrane-associated protein                                       | CDS | 87221  | 87403  | 183  | 1 | forward |
| putative membrane-associated protein CDS                       |      | putative membrane-associated protein                                       | CDS | 7078   | 7419   | 342  | 1 | forward |
| putative membrane-associated protein CDS                       |      | putative membrane-associated protein                                       | CDS | 5109   | 5282   | 174  | 1 | forward |
| mbpO CDS; putative membrane-associated protein CDS             | mbpO | putative membrane protein MbpO; putative membrane-associated protein       | CDS | 93582  | 93872  | 291  | 1 | forward |
| mbpN CDS; putative membrane-associated protein CDS             | mbpN | putative membrane protein MbpN; putative membrane-associated protein       | CDS | 93188  | 93346  | 159  | 1 | forward |
| mbpM CDS; putative membrane-associated protein CDS             | mbpM | putative membrane protein MbpM; putative membrane-associated protein       | CDS | 90184  | 90585  | 402  | 1 | forward |
| mbpL CDS; putative membrane-associated protein CDS             | mbpL | putative membrane protein MbpL; putative membrane-associated protein       | CDS | 90897  | 91184  | 288  | 1 | forward |
| putative capsid component CDS                                  |      | putative capsid component                                                  | CDS | 75459  | 75779  | 321  | 1 | forward |
| putative capsid component CDS                                  |      | putative capsid component                                                  | CDS | 75258  | 75374  | 117  | 1 | forward |
| pufC CDS                                                       | pufC | PufC                                                                       | CDS | 90093  | 90167  | 75   | 1 | forward |
| pufB CDS                                                       | pufB | PufB                                                                       | CDS | 89961  | 90029  | 69   | 1 | forward |
| hypothetical protein CDS; pufA CDS                             | pufA | PufA; hypothetical protein                                                 | CDS | 84991  | 85053  | 63   | 1 | forward |
| portal protein CDS; prt CDS                                    | prt  | Prt; portal protein                                                        | CDS | 7812   | 9503   | 1692 | 1 | forward |
| pro CDS; prohead protease CDS                                  | pro  | Pro; prohead protease                                                      | CDS | 9697   | 10470  | 774  | 1 | forward |
| pri CDS; DNA primase CDS                                       | pri  | Pri; DNA primase                                                           | CDS | 56931  | 57998  | 1068 | 1 | forward |



|                                                               |                |                                                                            |     |        |        |      |   |         |
|---------------------------------------------------------------|----------------|----------------------------------------------------------------------------|-----|--------|--------|------|---|---------|
| polA CDS                                                      | polA           | PolA                                                                       | CDS | 64896  | 69994  | 3219 | 3 | forward |
| phosphate starvation-inducible protein CDS; phr CDS           | phr            | Phr; phosphate starvation-inducible protein                                | CDS | 128781 | 129521 | 741  | 1 | reverse |
| nrdI CDS                                                      | nrdI           | NrdI                                                                       | CDS | 59428  | 59859  | 432  | 1 | forward |
| nrdF CDS; putative ribonucleotide reductase minor subunit CDS | nrdF           | NrdF; putative ribonucleotide reductase minor subunit                      | CDS | 62002  | 63051  | 1050 | 1 | forward |
| nrdE CDS; putative ribonucleotide reductase large subunit CDS | nrdE           | NrdE; putative ribonucleotide reductase large subunit                      | CDS | 59874  | 61988  | 2115 | 1 | forward |
| nadV CDS; nicotinamide phosphoribosyltransferase CDS          | nadV           | NadV; nicotinamide phosphoribosyltransferase                               | CDS | 95195  | 96664  | 1470 | 1 | forward |
| major capsid protein CDS; mcp CDS                             | mcp            | Mcp; major capsid protein                                                  | CDS | 11555  | 12946  | 1392 | 1 | forward |
| mbpZ CDS; putative membrane-associated protein CDS            | mbpZ           | MbpZ; putative membrane-associated protein                                 | CDS | 91641  | 91820  | 180  | 1 | forward |
| mbpY CDS; putative membrane-associated protein CDS            | mbpY           | MbpY; putative membrane-associated protein                                 | CDS | 86448  | 86696  | 249  | 1 | forward |
| mbpX CDS; putative membrane-associated protein CDS            | mbpX           | MbpX; putative membrane-associated protein                                 | CDS | 21894  | 22088  | 195  | 1 | forward |
| mbpW CDS; putative membrane-associated protein CDS            | mbpW           | MbpW; putative membrane-associated protein                                 | CDS | 1020   | 1286   | 267  | 1 | reverse |
| mbpV CDS; putative membrane-associated protein CDS            | mbpV           | MbpV; putative membrane-associated protein                                 | CDS | 134405 | 134713 | 309  | 1 | reverse |
| mbpU CDS; putative membrane-associated protein CDS            | mbpU           | MbpU; putative membrane-associated protein                                 | CDS | 128488 | 128712 | 225  | 1 | reverse |
| mbpT CDS; putative membrane-associated protein CDS            | mbpT           | MbpT; putative membrane-associated protein                                 | CDS | 110018 | 110209 | 192  | 1 | reverse |
| mbpS CDS; prohibitin domain membrane protein CDS              | mbpS           | MbpS; prohibitin domain membrane protein; putative membrane protein MbpS   | CDS | 133614 | 134405 | 792  | 1 | reverse |
| mbpR CDS; putative membrane-associated protein CDS            | mbpR           | MbpR; putative membrane protein MbpR; putative membrane-associated protein | CDS | 119850 | 120125 | 276  | 1 | reverse |
| mbpK CDS                                                      | mbpK           | MbpK; putative membrane protein MbpK                                       | CDS | 87212  | 87403  | 192  | 1 | forward |
| mbpJ CDS; putative membrane-associated protein CDS            | mbpJ           | MbpJ; putative membrane protein MbpJ; putative membrane-associated protein | CDS | 85900  | 86433  | 534  | 1 | forward |
| mbpI CDS; putative membrane-associated protein CDS            | mbpI           | MbpI; putative membrane protein MbpI; putative membrane-associated protein | CDS | 88144  | 88422  | 279  | 1 | forward |
| mbpH CDS; putative membrane-associated protein CDS            | mbpH           | MbpH; putative membrane protein MbpH; putative membrane-associated protein | CDS | 84576  | 84974  | 399  | 1 | forward |
| hypothetical protein CDS; mbpG CDS                            | mbpG           | MbpG; hypothetical protein; putative membrane protein MbpG                 | CDS | 78393  | 78761  | 369  | 1 | forward |
| mbpF CDS; putative membrane-associated protein CDS            | mbpF           | MbpF; putative membrane-associated protein; putative membrane protein MbpF | CDS | 5800   | 6993   | 1194 | 1 | forward |
| mbpE CDS                                                      | mbpE           | MbpE; putative membrane protein MbpE                                       | CDS | 7069   | 7419   | 351  | 1 | forward |
| mbpD CDS; putative membrane-associated protein CDS            | mbpD           | MbpD; putative membrane protein MbpD; putative membrane-associated protein | CDS | 1427   | 1813   | 387  | 1 | forward |
| hypothetical protein CDS; mbpC CDS                            | mbpC           | MbpC; hypothetical protein                                                 | CDS | 661    | 987    | 327  | 1 | reverse |
| mbpB CDS; putative membrane-associated protein CDS            | mbpB           | MbpB; putative membrane-associated protein                                 | CDS | 126402 | 126980 | 579  | 1 | reverse |
| mbpA CDS; putative membrane-associated protein CDS            | mbpA           | MbpA; putative membrane protein MbpA; putative membrane-associated protein | CDS | 110206 | 110691 | 486  | 1 | reverse |
| N-acetylmuramoyl-L-alanine amidase CDS; lysK CDS              | lysK           | LysK; N-acetylmuramoyl-L-alanine amidase                                   | CDS | 134826 | 137189 | 1488 | 2 | reverse |
| RNA ligase CDS; lig CDS                                       | lig            | Lig; RNA ligase                                                            | CDS | 127592 | 128488 | 897  | 1 | reverse |
| Iro CDS; iro CDS; putative cytoplasmic protein CDS            | Iro; iro       | Iro; putative cytoplasmic protein                                          | CDS | 139509 | 139727 | 219  | 1 | reverse |
| Ioh CDS; putative group I intron-encoded nuclease CDS         | Ioh            | Ioh; putative group I intron-encoded nuclease                              | CDS | 19790  | 21193  | 1404 | 1 | forward |
| I-KsaII CDS; ksaII CDS; putative endonuclease CDS             | I-KsaII; ksaII | I-KsaII; KsaII; putative endonuclease                                      | CDS | 65934  | 66446  | 513  | 1 | forward |
| hypothetical protein CDS; virion component CDS                |                | hypothetical protein; virion component                                     | CDS | 92419  | 93099  | 681  | 1 | forward |
| hypothetical protein CDS; transglycosylase CDS                |                | hypothetical protein; transglycosylase                                     | CDS | 117371 | 117760 | 390  | 1 | reverse |
| hypothetical protein CDS; transcriptional regulator CDS       |                | hypothetical protein; transcriptional regulator                            | CDS | 131463 | 131693 | 231  | 1 | reverse |

|                                                                    |  |                                                            |     |        |        |      |   |         |
|--------------------------------------------------------------------|--|------------------------------------------------------------|-----|--------|--------|------|---|---------|
| hypothetical protein CDS; tail central spike CDS                   |  | hypothetical protein; tail central spike                   | CDS | 31168  | 33720  | 2553 | 1 | forward |
| hypothetical protein CDS; tail assembly chaperone CDS              |  | hypothetical protein; tail assembly chaperone              | CDS | 22613  | 23071  | 459  | 1 | forward |
| hypothetical protein CDS; serine/threonine protein phosphatase CDS |  | hypothetical protein; serine/threonine protein phosphatase | CDS | 112579 | 113286 | 708  | 1 | reverse |
| hypothetical protein CDS; resolvase CDS                            |  | hypothetical protein; resolvase                            | CDS | 58842  | 59450  | 609  | 1 | forward |
| hypothetical protein CDS; receptor binding protein CDS             |  | hypothetical protein; receptor binding protein             | CDS | 46632  | 48008  | 1377 | 1 | forward |
| hypothetical protein CDS; receptor binding protein CDS             |  | hypothetical protein; receptor binding protein             | CDS | 44306  | 46228  | 1923 | 1 | forward |
| hypothetical protein CDS; putative virion component CDS            |  | hypothetical protein; putative virion component            | CDS | 129573 | 130187 | 615  | 1 | reverse |
| hypothetical protein CDS; putative transcription regulator CDS     |  | hypothetical protein; putative transcription regulator     | CDS | 91195  | 91311  | 117  | 1 | forward |
| hypothetical protein CDS; putative structural protein CDS          |  | hypothetical protein; putative structural protein          | CDS | 82827  | 83285  | 459  | 1 | forward |
| hypothetical protein CDS; putative nucleotide kinase CDS           |  | hypothetical protein; putative nucleotide kinase           | CDS | 122572 | 122988 | 417  | 1 | reverse |
| hypothetical protein CDS; putative non-cytoplasmic protein CDS     |  | hypothetical protein; putative non-cytoplasmic protein     | CDS | 130832 | 131473 | 642  | 1 | reverse |
| hypothetical protein CDS; putative non-cytoplasmic protein CDS     |  | hypothetical protein; putative non-cytoplasmic protein     | CDS | 130618 | 130809 | 192  | 1 | reverse |
| hypothetical protein CDS; putative non-cytoplasmic protein CDS     |  | hypothetical protein; putative non-cytoplasmic protein     | CDS | 125942 | 126205 | 264  | 1 | reverse |
| hypothetical protein CDS; putative non-cytoplasmic protein CDS     |  | hypothetical protein; putative non-cytoplasmic protein     | CDS | 123816 | 125864 | 2049 | 1 | reverse |
| hypothetical protein CDS; putative non-cytoplasmic protein CDS     |  | hypothetical protein; putative non-cytoplasmic protein     | CDS | 123655 | 123816 | 162  | 1 | reverse |
| hypothetical protein CDS; putative non-cytoplasmic protein CDS     |  | hypothetical protein; putative non-cytoplasmic protein     | CDS | 123423 | 123611 | 189  | 1 | reverse |
| hypothetical protein CDS; putative non-cytoplasmic protein CDS     |  | hypothetical protein; putative non-cytoplasmic protein     | CDS | 120125 | 120970 | 846  | 1 | reverse |
| hypothetical protein CDS; putative non-cytoplasmic protein CDS     |  | hypothetical protein; putative non-cytoplasmic protein     | CDS | 118605 | 119147 | 543  | 1 | reverse |
| hypothetical protein CDS; putative non-cytoplasmic protein CDS     |  | hypothetical protein; putative non-cytoplasmic protein     | CDS | 116214 | 116951 | 738  | 1 | reverse |
| hypothetical protein CDS; putative non-cytoplasmic protein CDS     |  | hypothetical protein; putative non-cytoplasmic protein     | CDS | 115811 | 116029 | 219  | 1 | reverse |
| hypothetical protein CDS; putative non-cytoplasmic protein CDS     |  | hypothetical protein; putative non-cytoplasmic protein     | CDS | 115259 | 115807 | 549  | 1 | reverse |
| hypothetical protein CDS; putative non-cytoplasmic protein CDS     |  | hypothetical protein; putative non-cytoplasmic protein     | CDS | 110684 | 111115 | 432  | 1 | reverse |
| hypothetical protein CDS; putative non-cytoplasmic protein CDS     |  | hypothetical protein; putative non-cytoplasmic protein     | CDS | 5279   | 5758   | 480  | 1 | forward |
| hypothetical protein CDS; putative non-cytoplasmic protein CDS     |  | hypothetical protein; putative non-cytoplasmic protein     | CDS | 2066   | 2476   | 411  | 1 | forward |
| hypothetical protein CDS; putative neck protein CDS                |  | hypothetical protein; putative neck protein                | CDS | 13347  | 14255  | 909  | 1 | forward |
| hypothetical protein CDS; putative membrane-associated protein CDS |  | hypothetical protein; putative membrane-associated protein | CDS | 91301  | 91564  | 264  | 1 | forward |
| hypothetical protein CDS; putative membrane-associated protein CDS |  | hypothetical protein; putative membrane-associated protein | CDS | 85519  | 85698  | 180  | 1 | forward |
| hypothetical protein CDS; putative membrane-associated protein CDS |  | hypothetical protein; putative membrane-associated protein | CDS | 85368  | 85532  | 165  | 1 | forward |
| hypothetical protein CDS; putative HNH endonuclease CDS            |  | hypothetical protein; putative HNH endonuclease            | CDS | 132912 | 133547 | 636  | 1 | reverse |
| hypothetical protein CDS; putative endonuclease CDS                |  | hypothetical protein; putative endonuclease                | CDS | 89162  | 89764  | 603  | 1 | forward |
| hypothetical protein CDS; putative DNA repair exonuclease CDS      |  | hypothetical protein; putative DNA repair exonuclease      | CDS | 77129  | 78379  | 1251 | 1 | forward |
| hypothetical protein CDS; putative cytoplasmic protein CDS         |  | hypothetical protein; putative cytoplasmic protein         | CDS | 131696 | 131923 | 228  | 1 | reverse |
| hypothetical protein CDS; putative cytoplasmic protein CDS         |  | hypothetical protein; putative cytoplasmic protein         | CDS | 116030 | 116224 | 195  | 1 | reverse |
| hypothetical protein CDS; putative cytoplasmic protein CDS         |  | hypothetical protein; putative cytoplasmic protein         | CDS | 112184 | 112582 | 399  | 1 | reverse |
| hypothetical protein CDS; putative capsid component CDS            |  | hypothetical protein; putative capsid component            | CDS | 74612  | 75244  | 633  | 1 | forward |
| hypothetical protein CDS; putative baseplate component CDS         |  | hypothetical protein; putative baseplate component         | CDS | 46251  | 46625  | 375  | 1 | forward |

|                                                                    |  |                                                            |     |        |        |     |   |         |
|--------------------------------------------------------------------|--|------------------------------------------------------------|-----|--------|--------|-----|---|---------|
| hypothetical protein CDS; putative baseplate component CDS         |  | hypothetical protein; putative baseplate component         | CDS | 34618  | 35142  | 525 | 1 | forward |
| hypothetical protein CDS; putative baseplate component CDS         |  | hypothetical protein; putative baseplate component         | CDS | 33827  | 34618  | 792 | 1 | forward |
| hypothetical protein CDS; peptidoglycan binding protein CDS        |  | hypothetical protein; peptidoglycan binding protein        | CDS | 126222 | 126395 | 174 | 1 | reverse |
| hypothetical protein CDS; nucleotidyl transferase CDS              |  | hypothetical protein; nucleotidyl transferase              | CDS | 111129 | 111671 | 543 | 1 | reverse |
| hypothetical protein CDS; nucleoside 2-deoxyribosyltransferase CDS |  | hypothetical protein; nucleoside 2-deoxyribosyltransferase | CDS | 126973 | 127599 | 627 | 1 | reverse |
| hypothetical protein CDS; major tail protein CDS                   |  | hypothetical protein; major tail protein                   | CDS | 113956 | 114273 | 318 | 1 | reverse |
| hypothetical protein CDS                                           |  | hypothetical protein                                       | CDS | 122253 | 122579 | 327 | 1 | reverse |
| hypothetical protein CDS                                           |  | hypothetical protein                                       | CDS | 118073 | 118555 | 483 | 1 | reverse |
| hypothetical protein CDS                                           |  | hypothetical protein                                       | CDS | 117859 | 118032 | 174 | 1 | reverse |
| hypothetical protein CDS                                           |  | hypothetical protein                                       | CDS | 117130 | 117378 | 249 | 1 | reverse |
| hypothetical protein CDS                                           |  | hypothetical protein                                       | CDS | 117014 | 117118 | 105 | 1 | reverse |
| hypothetical protein CDS                                           |  | hypothetical protein                                       | CDS | 113386 | 113940 | 555 | 1 | reverse |
| hypothetical protein CDS                                           |  | hypothetical protein                                       | CDS | 111683 | 112171 | 489 | 1 | reverse |
| hypothetical protein CDS                                           |  | hypothetical protein                                       | CDS | 109584 | 109754 | 171 | 1 | reverse |
| hypothetical protein CDS                                           |  | hypothetical protein                                       | CDS | 109575 | 109754 | 180 | 1 | reverse |
| hypothetical protein CDS                                           |  | hypothetical protein                                       | CDS | 99396  | 99563  | 168 | 1 | forward |
| hypothetical protein CDS                                           |  | hypothetical protein                                       | CDS | 99375  | 99563  | 189 | 1 | forward |
| hypothetical protein CDS                                           |  | hypothetical protein                                       | CDS | 99067  | 99381  | 315 | 1 | forward |
| hypothetical protein CDS                                           |  | hypothetical protein                                       | CDS | 98849  | 99043  | 195 | 1 | forward |
| hypothetical protein CDS                                           |  | hypothetical protein                                       | CDS | 98834  | 99043  | 210 | 1 | forward |
| hypothetical protein CDS                                           |  | hypothetical protein                                       | CDS | 98514  | 98843  | 330 | 1 | forward |
| hypothetical protein CDS                                           |  | hypothetical protein                                       | CDS | 98003  | 98512  | 510 | 1 | forward |
| hypothetical protein CDS                                           |  | hypothetical protein                                       | CDS | 97689  | 98000  | 312 | 1 | forward |
| hypothetical protein CDS                                           |  | hypothetical protein                                       | CDS | 97402  | 97623  | 222 | 1 | forward |
| hypothetical protein CDS                                           |  | hypothetical protein                                       | CDS | 97008  | 97400  | 393 | 1 | forward |
| hypothetical protein CDS                                           |  | hypothetical protein                                       | CDS | 96743  | 96988  | 246 | 1 | forward |
| hypothetical protein CDS                                           |  | hypothetical protein                                       | CDS | 93964  | 94272  | 309 | 1 | forward |
| hypothetical protein CDS                                           |  | hypothetical protein                                       | CDS | 93381  | 93581  | 201 | 1 | forward |
| hypothetical protein CDS                                           |  | hypothetical protein                                       | CDS | 92101  | 92418  | 318 | 1 | forward |
| hypothetical protein CDS                                           |  | hypothetical protein                                       | CDS | 91835  | 92098  | 264 | 1 | forward |
| hypothetical protein CDS                                           |  | hypothetical protein                                       | CDS | 90587  | 90880  | 294 | 1 | forward |
| hypothetical protein CDS                                           |  | hypothetical protein                                       | CDS | 90086  | 90184  | 99  | 1 | forward |
| hypothetical protein CDS                                           |  | hypothetical protein                                       | CDS | 89778  | 89957  | 180 | 1 | forward |
| hypothetical protein CDS                                           |  | hypothetical protein                                       | CDS | 88812  | 89162  | 351 | 1 | forward |
| hypothetical protein CDS                                           |  | hypothetical protein                                       | CDS | 88492  | 88797  | 306 | 1 | forward |
| hypothetical protein CDS                                           |  | hypothetical protein                                       | CDS | 87797  | 88144  | 348 | 1 | forward |
| hypothetical protein CDS                                           |  | hypothetical protein                                       | CDS | 87416  | 87784  | 369 | 1 | forward |
| hypothetical protein CDS                                           |  | hypothetical protein                                       | CDS | 86877  | 87173  | 297 | 1 | forward |
| hypothetical protein CDS                                           |  | hypothetical protein                                       | CDS | 86708  | 86884  | 177 | 1 | forward |
| hypothetical protein CDS                                           |  | hypothetical protein                                       | CDS | 85121  | 85363  | 243 | 1 | forward |
| hypothetical protein CDS                                           |  | hypothetical protein                                       | CDS | 83810  | 84514  | 705 | 1 | forward |
| hypothetical protein CDS                                           |  | hypothetical protein                                       | CDS | 83350  | 83793  | 444 | 1 | forward |
| hypothetical protein CDS                                           |  | hypothetical protein                                       | CDS | 82078  | 82809  | 732 | 1 | forward |
| hypothetical protein CDS                                           |  | hypothetical protein                                       | CDS | 80843  | 81706  | 864 | 1 | forward |
| hypothetical protein CDS                                           |  | hypothetical protein                                       | CDS | 80397  | 80843  | 447 | 1 | forward |

|                                                              |                  |                                                 |     |        |        |      |   |         |
|--------------------------------------------------------------|------------------|-------------------------------------------------|-----|--------|--------|------|---|---------|
| hypothetical protein CDS                                     |                  | hypothetical protein                            | CDS | 79652  | 80419  | 768  | 1 | forward |
| hypothetical protein CDS                                     |                  | hypothetical protein                            | CDS | 79123  | 79659  | 537  | 1 | forward |
| hypothetical protein CDS                                     |                  | hypothetical protein                            | CDS | 78748  | 79059  | 312  | 1 | forward |
| hypothetical protein CDS                                     |                  | hypothetical protein                            | CDS | 76381  | 77136  | 756  | 1 | forward |
| hypothetical protein CDS                                     |                  | hypothetical protein                            | CDS | 76117  | 76377  | 261  | 1 | forward |
| hypothetical protein CDS                                     |                  | hypothetical protein                            | CDS | 73482  | 73835  | 354  | 1 | forward |
| hypothetical protein CDS                                     |                  | hypothetical protein                            | CDS | 70891  | 72162  | 1272 | 1 | forward |
| hypothetical protein CDS                                     |                  | hypothetical protein                            | CDS | 70322  | 70804  | 483  | 1 | forward |
| hypothetical protein CDS                                     |                  | hypothetical protein                            | CDS | 70063  | 70305  | 243  | 1 | forward |
| hypothetical protein CDS                                     |                  | hypothetical protein                            | CDS | 63945  | 64505  | 561  | 1 | forward |
| hypothetical protein CDS                                     |                  | hypothetical protein                            | CDS | 63909  | 64505  | 597  | 1 | forward |
| hypothetical protein CDS                                     |                  | hypothetical protein                            | CDS | 63069  | 63398  | 330  | 1 | forward |
| hypothetical protein CDS                                     |                  | hypothetical protein                            | CDS | 58403  | 58855  | 453  | 1 | forward |
| hypothetical protein CDS                                     |                  | hypothetical protein                            | CDS | 58065  | 58403  | 339  | 1 | forward |
| hypothetical protein CDS                                     |                  | hypothetical protein                            | CDS | 54024  | 54401  | 378  | 1 | forward |
| hypothetical protein CDS                                     |                  | hypothetical protein                            | CDS | 49860  | 51473  | 1614 | 1 | forward |
| hypothetical protein CDS                                     |                  | hypothetical protein                            | CDS | 44147  | 44305  | 159  | 1 | forward |
| hypothetical protein CDS                                     |                  | hypothetical protein                            | CDS | 22170  | 22481  | 312  | 1 | forward |
| hypothetical protein CDS                                     |                  | hypothetical protein                            | CDS | 21423  | 21881  | 459  | 1 | forward |
| hypothetical protein CDS                                     |                  | hypothetical protein                            | CDS | 21240  | 21380  | 141  | 1 | forward |
| hypothetical protein CDS                                     |                  | hypothetical protein                            | CDS | 16624  | 16839  | 216  | 1 | forward |
| hypothetical protein CDS                                     |                  | hypothetical protein                            | CDS | 15147  | 15767  | 621  | 1 | forward |
| hypothetical protein CDS                                     |                  | hypothetical protein                            | CDS | 13038  | 13334  | 297  | 1 | forward |
| hypothetical protein CDS                                     |                  | hypothetical protein                            | CDS | 10489  | 11439  | 951  | 1 | forward |
| hypothetical protein CDS                                     |                  | hypothetical protein                            | CDS | 7437   | 7808   | 372  | 1 | forward |
| hypothetical protein CDS                                     |                  | hypothetical protein                            | CDS | 5100   | 5282   | 183  | 1 | forward |
| hypothetical protein CDS                                     |                  | hypothetical protein                            | CDS | 4301   | 5122   | 822  | 1 | forward |
| holA CDS; holin CDS                                          | holA             | HolA; holin                                     | CDS | 137189 | 137692 | 504  | 1 | reverse |
| HNH homing endonuclease CDS; treM CDS                        | treM             | HNH homing endonuclease; TreM                   | CDS | 104914 | 105402 | 489  | 1 | reverse |
| HNH homing endonuclease CDS; I-KsaIII CDS; ksaIII CDS        | I-KsaIII; ksaIII | HNH homing endonuclease; HnhC; KsaIII; I-KsaIII | CDS | 68091  | 68900  | 810  | 1 | forward |
| HNH endonuclease CDS; ksaI CDS                               | ksaI             | HNH endonuclease; KsaI                          | CDS | 135726 | 136226 | 501  | 1 | reverse |
| hmzG CDS; putative NTP pyrophosphohydrolase CDS              | hmzG             | HmzG; putative NTP pyrophosphohydrolase         | CDS | 123121 | 123423 | 303  | 1 | reverse |
| DUF1024 domain protein CDS                                   |                  | DUF1024 domain protein                          | CDS | 109761 | 110015 | 255  | 1 | reverse |
| DNA polymerase I CDS                                         |                  | DNA polymerase I                                | CDS | 64896  | 69994  | 3219 | 3 | forward |
| DNA helicase CDS; dhIB CDS                                   | dhIB             | DNA helicase; DhIB                              | CDS | 51466  | 52908  | 1443 | 1 | forward |
| DNA helicase CDS; dhIA CDS                                   | dhIA             | DNA helicase; DhIA                              | CDS | 48100  | 49848  | 1749 | 1 | forward |
| dmd CDS; putative cytoplasmic protein CDS                    | dmd              | Dmd; putative cytoplasmic protein               | CDS | 1791   | 2069   | 279  | 1 | forward |
| dmcB CDS; virion component CDS                               | dmcB             | DmcB; virion component                          | CDS | 94     | 303    | 210  | 1 | reverse |
| dmcA CDS; putative membrane-associated protein CDS           | dmcA             | DmcA; putative membrane-associated protein      | CDS | 316    | 648    | 333  | 1 | reverse |
| bofR CDS                                                     | bofR             | BofR                                            | CDS | 99600  | 99701  | 102  | 1 | forward |
| bofL CDS; putative non-cytoplasmic protein CDS               | bofL             | BofL; putative non-cytoplasmic protein          | CDS | 108441 | 108677 | 237  | 1 | reverse |
| baseplate protein CDS; bmpC CDS                              | bmpC             | BmpC; baseplate protein                         | CDS | 40098  | 40619  | 522  | 1 | forward |
| baseplate component CDS; bmpB CDS                            | bmpB             | BmpB; baseplate component                       | CDS | 35861  | 36907  | 1047 | 1 | forward |
| baseplate wedge subunit CDS; bmpA CDS                        | bmpA             | BmpA; baseplate wedge subunit                   | CDS | 35142  | 35846  | 705  | 1 | forward |
| baseplate hub assembly protein CDS; hypothetical protein CDS |                  | baseplate hub assembly protein;                 | CDS | 15786  | 16622  | 837  | 1 | forward |

|                                                        |     |                                         |     |        |        |      |   |         |
|--------------------------------------------------------|-----|-----------------------------------------|-----|--------|--------|------|---|---------|
|                                                        |     | hypothetical protein                    |     |        |        |      |   |         |
| <b>anti-sigma factor CDS; asf CDS</b>                  | asf | Asf; anti-sigma factor                  | CDS | 56320  | 56916  | 597  | 1 | forward |
| <b>AAA family ATPase CDS; hypothetical protein CDS</b> |     | AAA family ATPase; hypothetical protein | CDS | 120982 | 122100 | 1119 | 1 | reverse |

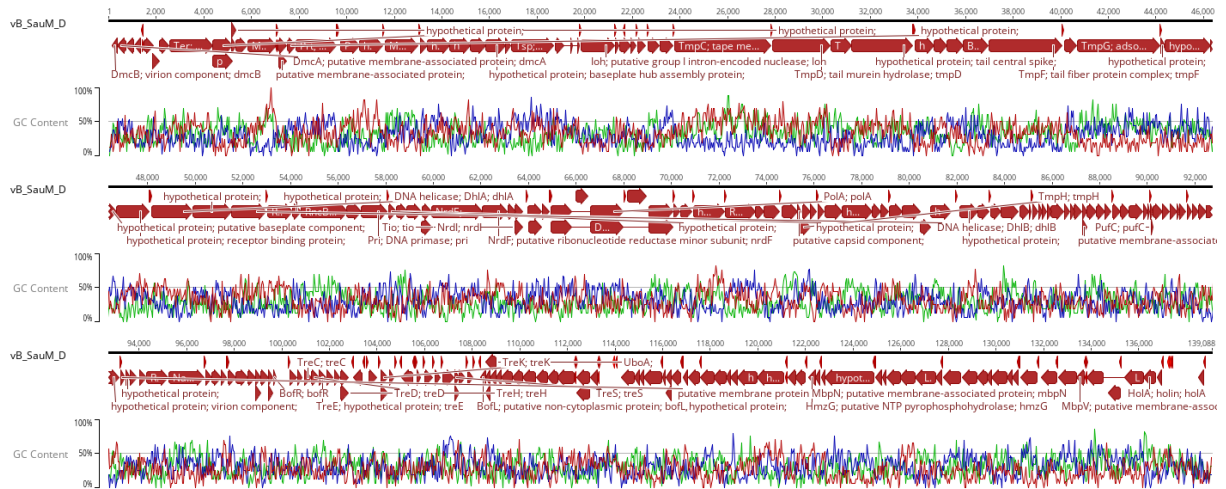

Figure S3. Genome organization of bacteriophage vB\_SauM\_D

Table S3. Genome annotation of bacteriophage vB\_SauM\_D

| Name                                               | gene | product                                    | Type | Minimum | Maximum | Length | # Intervals | Direction |
|----------------------------------------------------|------|--------------------------------------------|------|---------|---------|--------|-------------|-----------|
| hypothetical protein CDS; uphA CDS                 | uphA | UphA; hypothetical protein                 | CDS  | 136778  | 136963  | 186    | 1           | reverse   |
| UboA CDS                                           |      | UboA                                       | CDS  | 108582  | 109013  | 432    | 1           | reverse   |
| tsp CDS; tail sheath protein CDS                   | tsp  | Tsp; tail sheath protein                   | CDS  | 16922   | 18685   | 1764   | 1           | forward   |
| tRNA-Phe                                           |      | tRNA-Phe                                   | tRNA | 137203  | 137275  | 73     | 1           | reverse   |
| tRNA-Met                                           |      | tRNA-Met                                   | tRNA | 113906  | 113977  | 72     | 1           | reverse   |
| tRNA-Asp                                           |      | tRNA-Asp                                   | tRNA | 137282  | 137355  | 74     | 1           | reverse   |
| integration host factor CDS; trf CDS               | trf  | Trf; integration host factor               | CDS  | 64571   | 64876   | 306    | 1           | forward   |
| hypothetical protein CDS; treU CDS                 | treU | TreU; hypothetical protein                 | CDS  | 107801  | 108022  | 222    | 1           | forward   |
| treT CDS; hypothetical protein CDS                 | treT | TreT; hypothetical protein                 | CDS  | 107447  | 107716  | 270    | 1           | forward   |
| hypothetical protein CDS; treS CDS                 | treS | TreS; hypothetical protein                 | CDS  | 107274  | 107447  | 174    | 1           | forward   |
| treS CDS                                           | treS | TreS                                       | CDS  | 107265  | 107447  | 183    | 1           | forward   |
| putative non-cytoplasmic protein CDS; treR CDS     | treR | TreR; putative non-cytoplasmic protein     | CDS  | 106745  | 107215  | 471    | 1           | forward   |
| hypothetical protein CDS; treQ CDS                 | treQ | TreQ; hypothetical protein                 | CDS  | 106429  | 106665  | 237    | 1           | forward   |
| hypothetical protein CDS; treP CDS                 | treP | TreP; hypothetical protein                 | CDS  | 106006  | 106329  | 324    | 1           | forward   |
| treN CDS; putative membrane-associated protein CDS | treN | TreN; putative membrane-associated protein | CDS  | 105680  | 105838  | 159    | 1           | forward   |
| hypothetical protein CDS; treL CDS                 | treL | TreL; hypothetical protein                 | CDS  | 104516  | 104707  | 192    | 1           | forward   |
| hypothetical protein CDS; treK CDS                 | treK | TreK; hypothetical protein                 | CDS  | 104179  | 104466  | 288    | 1           | forward   |
| treK CDS                                           | treK | TreK                                       | CDS  | 104179  | 104462  | 284    | 1           | forward   |
| treJ CDS; hypothetical protein CDS                 | treJ | TreJ; hypothetical protein                 | CDS  | 103665  | 103973  | 309    | 1           | forward   |
| hypothetical protein CDS; treI CDS                 | treI | TreI; hypothetical protein                 | CDS  | 103016  | 103354  | 339    | 1           | reverse   |
| hypothetical protein CDS; treH CDS                 | treH | TreH; hypothetical protein                 | CDS  | 102460  | 102807  | 348    | 1           | forward   |
| treH CDS                                           | treH | TreH                                       | CDS  | 102463  | 102807  | 345    | 1           | forward   |
| treG CDS; hypothetical protein CDS                 | treG | TreG; hypothetical protein                 | CDS  | 102210  | 102449  | 240    | 1           | forward   |
| hypothetical protein CDS; treF CDS                 | treF | TreF; hypothetical protein                 | CDS  | 101875  | 102132  | 258    | 1           | forward   |
| treE CDS; hypothetical protein CDS                 | treE | TreE; hypothetical protein                 | CDS  | 101578  | 101871  | 294    | 1           | forward   |
| treD CDS                                           | treD | TreD                                       | CDS  | 101236  | 101562  | 327    | 1           | forward   |
| treC CDS                                           | treC | TreC                                       | CDS  | 100949  | 101236  | 288    | 1           | forward   |

|                                                       |      |                                                                      |     |        |        |      |   |         |
|-------------------------------------------------------|------|----------------------------------------------------------------------|-----|--------|--------|------|---|---------|
| putative transmembrane protein CDS; treB CDS          | treB | TreB; putative transmembrane protein                                 | CDS | 100657 | 100842 | 186  | 1 | forward |
| putative non-cytoplasmic protein CDS; treA CDS        | treA | TreA; putative non-cytoplasmic protein                               | CDS | 100342 | 100641 | 300  | 1 | forward |
| tail protein CDS; tmpI CDS                            | tmpI | TmpI; tail protein                                                   | CDS | 75850  | 76077  | 228  | 1 | forward |
| tmpH CDS                                              | tmpH | TmpH                                                                 | CDS | 75323  | 75835  | 513  | 1 | forward |
| tmpG CDS; adsorption-associated tail protein CDS      | tmpG | TmpG; adsorption-associated tail protein                             | CDS | 40696  | 44154  | 3459 | 1 | forward |
| tmpF CDS; tail fiber protein complex CDS              | tmpF | TmpF; tail fiber protein complex                                     | CDS | 36984  | 40043  | 3060 | 1 | forward |
| putative cysteine protease CDS; tmpE CDS              | tmpE | TmpE; putative cysteine protease                                     | CDS | 30337  | 31224  | 888  | 1 | forward |
| tail murein hydrolase CDS; tmpD CDS                   | tmpD | TmpD; tail murein hydrolase                                          | CDS | 27897  | 30323  | 2427 | 1 | forward |
| tmpC CDS; tape measure protein CDS                    | tmpC | TmpC; tape measure protein                                           | CDS | 23760  | 27818  | 4059 | 1 | forward |
| tmpB CDS; tail morphogenetic protein CDS              | tmpB | TmpB; tail morphogenetic protein                                     | CDS | 23171  | 23707  | 537  | 1 | forward |
| tail tube protein CDS; tmpA CDS                       | tmpA | TmpA; tail tube protein                                              | CDS | 18758  | 19747  | 426  | 3 | forward |
| putative oxidoreductase CDS; tio CDS                  | tio  | Tio; putative oxidoreductase                                         | CDS | 63438  | 63758  | 321  | 1 | forward |
| tio CDS                                               | tio  | Tio                                                                  | CDS | 63447  | 63758  | 312  | 1 | forward |
| lytic transglycosylase CDS; tgl CDS                   | tgl  | Tgl; lytic transglycosylase                                          | CDS | 131034 | 131726 | 693  | 1 | reverse |
| ter CDS; terminase large subunit CDS                  | ter  | Ter; terminase large subunit                                         | CDS | 2547   | 4364   | 1818 | 1 | forward |
| sig CDS; sigma factor CDS                             | sig  | Sig; sigma factor                                                    | CDS | 73878  | 74540  | 663  | 1 | forward |
| hypothetical protein CDS; sci CDS                     | sci  | Sci; hypothetical protein                                            | CDS | 85790  | 85966  | 177  | 1 | forward |
| ribose-phosphate pyrophosphokinase CDS; rpp CDS       | rpp  | Rpp; ribose-phosphate pyrophosphokinase                              | CDS | 94325  | 95233  | 909  | 1 | forward |
| recombination-related endonuclease CDS; rncB CDS      | rncB | RncB; recombination-related endonuclease                             | CDS | 54457  | 56376  | 1920 | 1 | forward |
| recombination-related endonuclease CDS; rncA CDS      | rncA | RncA; recombination-related endonuclease                             | CDS | 53043  | 54080  | 1038 | 1 | forward |
| ribonucleotide reductase stimulatory protein CDS      |      | ribonucleotide reductase stimulatory protein                         | CDS | 59523  | 59915  | 393  | 1 | forward |
| rec CDS; recombinase CDS                              | rec  | Rec; recombinase                                                     | CDS | 72278  | 73534  | 1257 | 1 | forward |
| rhn CDS; ribonuclease H CDS                           | rhn  | Rhn; ribonuclease H                                                  | CDS | 129204 | 129629 | 426  | 1 | reverse |
| putative virion protein CDS; hypothetical protein CDS |      | putative virion protein; hypothetical protein                        | CDS | 4378   | 5178   | 801  | 1 | forward |
| putative non-cytoplasmic protein CDS                  |      | putative non-cytoplasmic protein                                     | CDS | 116128 | 116367 | 240  | 1 | reverse |
| putative non-cytoplasmic protein CDS                  |      | putative non-cytoplasmic protein                                     | CDS | 112384 | 112935 | 552  | 1 | reverse |
| putative membrane-associated protein CDS              |      | putative membrane-associated protein                                 | CDS | 87277  | 87459  | 183  | 1 | forward |
| putative membrane-associated protein CDS              |      | putative membrane-associated protein                                 | CDS | 7134   | 7475   | 342  | 1 | forward |
| putative membrane-associated protein CDS              |      | putative membrane-associated protein                                 | CDS | 5165   | 5338   | 174  | 1 | forward |
| mbpO CDS; putative membrane-associated protein CDS    | mbpO | putative membrane protein MbpO; putative membrane-associated protein | CDS | 93638  | 93928  | 291  | 1 | forward |
| mbpN CDS; putative membrane-associated protein CDS    | mbpN | putative membrane protein MbpN; putative membrane-associated protein | CDS | 93244  | 93402  | 159  | 1 | forward |
| mbpM CDS; putative membrane-associated protein CDS    | mbpM | putative membrane protein MbpM; putative membrane-associated protein | CDS | 90240  | 90641  | 402  | 1 | forward |
| mbpL CDS; putative membrane-associated protein CDS    | mbpL | putative membrane protein MbpL; putative membrane-associated protein | CDS | 90953  | 91240  | 288  | 1 | forward |
| putative capsid component CDS                         |      | putative capsid component                                            | CDS | 75515  | 75835  | 321  | 1 | forward |
| putative capsid component CDS                         |      | putative capsid component                                            | CDS | 75314  | 75430  | 117  | 1 | forward |
| pufC CDS                                              | pufC | PufC                                                                 | CDS | 90149  | 90223  | 75   | 1 | forward |
| pufB CDS                                              | pufB | PufB                                                                 | CDS | 90017  | 90085  | 69   | 1 | forward |
| hypothetical protein CDS; pufA CDS                    | pufA | PufA; hypothetical protein                                           | CDS | 85047  | 85109  | 63   | 1 | forward |
| pri CDS; portal protein CDS                           | pri  | Pri; portal protein                                                  | CDS | 7868   | 9559   | 1692 | 1 | forward |
| pro CDS; prohead protease CDS                         | pro  | Pro; prohead protease                                                | CDS | 9753   | 10526  | 774  | 1 | forward |
| pri CDS; DNA primase CDS                              | pri  | Pri; DNA primase                                                     | CDS | 56987  | 58054  | 1068 | 1 | forward |
| polA CDS                                              | polA | PolA                                                                 | CDS | 64952  | 70050  | 3219 | 3 | forward |
| phosphate starvation-inducible protein CDS; phr CDS   | phr  | Phr; phosphate starvation-inducible protein                          | CDS | 127782 | 128522 | 741  | 1 | reverse |

|                                                                           |                |                                                                            |     |        |        |      |   |         |
|---------------------------------------------------------------------------|----------------|----------------------------------------------------------------------------|-----|--------|--------|------|---|---------|
| <b>nrdI CDS</b>                                                           | nrdI           | NrdI                                                                       | CDS | 59484  | 59915  | 432  | 1 | forward |
| <b>nrdF CDS; putative ribonucleotide reductase minor subunit CDS</b>      | nrdF           | NrdF; putative ribonucleotide reductase minor subunit                      | CDS | 62058  | 63107  | 1050 | 1 | forward |
| <b>nrdE CDS; putative ribonucleotide reductase large subunit CDS</b>      | nrdE           | NrdE; putative ribonucleotide reductase large subunit                      | CDS | 59930  | 62044  | 2115 | 1 | forward |
| <b>nadV CDS; nicotinamide phosphoribosyltransferase CDS</b>               | nadV           | NadV; nicotinamide phosphoribosyltransferase                               | CDS | 95251  | 96720  | 1470 | 1 | forward |
| <b>major capsid protein CDS; mcp CDS</b>                                  | mcp            | Mcp; major capsid protein                                                  | CDS | 11611  | 13002  | 1392 | 1 | forward |
| <b>mbpZ CDS; putative membrane-associated protein CDS</b>                 | mbpZ           | MbpZ; putative membrane-associated protein                                 | CDS | 91697  | 91876  | 180  | 1 | forward |
| <b>mbpY CDS; putative membrane-associated protein CDS</b>                 | mbpY           | MbpY; putative membrane-associated protein                                 | CDS | 86504  | 86752  | 249  | 1 | forward |
| <b>mbpX CDS; putative membrane-associated protein CDS</b>                 | mbpX           | MbpX; putative membrane-associated protein                                 | CDS | 21950  | 22144  | 195  | 1 | forward |
| <b>mbpW CDS; putative membrane-associated protein CDS</b>                 | mbpW           | MbpW; putative membrane-associated protein                                 | CDS | 1076   | 1342   | 267  | 1 | reverse |
| <b>mbpV CDS; putative membrane-associated protein CDS</b>                 | mbpV           | MbpV; putative membrane-associated protein                                 | CDS | 133406 | 133714 | 309  | 1 | reverse |
| <b>mbpU CDS; putative membrane-associated protein CDS</b>                 | mbpU           | MbpU; putative membrane-associated protein                                 | CDS | 127489 | 127713 | 225  | 1 | reverse |
| <b>mbpT CDS; putative membrane-associated protein CDS</b>                 | mbpT           | MbpT; putative membrane-associated protein                                 | CDS | 109016 | 109207 | 192  | 1 | reverse |
| <b>mbpS CDS; prohibitin domain membrane protein CDS</b>                   | mbpS           | MbpS; prohibitin domain membrane protein; putative membrane protein MbpS   | CDS | 132615 | 133406 | 792  | 1 | reverse |
| <b>mbpR CDS; putative membrane-associated protein CDS</b>                 | mbpR           | MbpR; putative membrane protein MbpR; putative membrane-associated protein | CDS | 118848 | 119126 | 279  | 1 | reverse |
| <b>mbpP CDS; putative membrane-associated protein CDS</b>                 | mbpP           | MbpP; putative membrane protein MbpP; putative membrane-associated protein | CDS | 118681 | 118845 | 165  | 1 | reverse |
| <b>mbpK CDS</b>                                                           | mbpK           | MbpK; putative membrane protein MbpK                                       | CDS | 87268  | 87459  | 192  | 1 | forward |
| <b>mbpJ CDS; putative membrane-associated protein CDS</b>                 | mbpJ           | MbpJ; putative membrane protein MbpJ; putative membrane-associated protein | CDS | 85956  | 86489  | 534  | 1 | forward |
| <b>mbpI CDS; putative membrane-associated protein CDS</b>                 | mbpI           | MbpI; putative membrane protein MbpI; putative membrane-associated protein | CDS | 88200  | 88478  | 279  | 1 | forward |
| <b>mbpH CDS; putative membrane-associated protein CDS</b>                 | mbpH           | MbpH; putative membrane protein MbpH; putative membrane-associated protein | CDS | 84632  | 85030  | 399  | 1 | forward |
| <b>hypothetical protein CDS; mbpG CDS</b>                                 | mbpG           | MbpG; hypothetical protein; putative membrane protein MbpG                 | CDS | 78449  | 78817  | 369  | 1 | forward |
| <b>mbpF CDS; putative membrane-associated protein CDS</b>                 | mbpF           | MbpF; putative membrane-associated protein; putative membrane protein MbpF | CDS | 5856   | 7049   | 1194 | 1 | forward |
| <b>mbpE CDS</b>                                                           | mbpE           | MbpE; putative membrane protein MbpE                                       | CDS | 7125   | 7475   | 351  | 1 | forward |
| <b>mbpD CDS; putative membrane-associated protein CDS</b>                 | mbpD           | MbpD; putative membrane protein MbpD; putative membrane-associated protein | CDS | 1483   | 1869   | 387  | 1 | forward |
| <b>hypothetical protein CDS; mbpC CDS</b>                                 | mbpC           | MbpC; hypothetical protein                                                 | CDS | 717    | 1043   | 327  | 1 | reverse |
| <b>mbpB CDS; putative membrane-associated protein CDS</b>                 | mbpB           | MbpB; putative membrane-associated protein                                 | CDS | 125403 | 125981 | 579  | 1 | reverse |
| <b>mbpA CDS; putative membrane-associated protein CDS</b>                 | mbpA           | MbpA; putative membrane protein MbpA; putative membrane-associated protein | CDS | 109204 | 109689 | 486  | 1 | reverse |
| <b>N-acetylmuramoyl-L-alanine amidase CDS; lysK CDS</b>                   | lysK           | LysK; N-acetylmuramoyl-L-alanine amidase                                   | CDS | 133827 | 136190 | 1488 | 2 | reverse |
| <b>RNA ligase CDS; lig CDS</b>                                            | lig            | Lig; RNA ligase                                                            | CDS | 126593 | 127489 | 897  | 1 | reverse |
| <b>Iro CDS; iro CDS; putative cytoplasmic protein CDS</b>                 | Iro; iro       | Iro; putative cytoplasmic protein                                          | CDS | 138510 | 138728 | 219  | 1 | reverse |
| <b>Ioh CDS; putative group I intron-encoded nuclease CDS</b>              | Ioh            | Ioh; putative group I intron-encoded nuclease                              | CDS | 19846  | 21249  | 1404 | 1 | forward |
| <b>I-KsaII CDS; ksaII CDS; putative endonuclease CDS</b>                  | I-KsaII; ksaII | I-KsaII; KsaII; putative endonuclease                                      | CDS | 65990  | 66502  | 513  | 1 | forward |
| <b>hypothetical protein CDS; virion component CDS</b>                     |                | hypothetical protein; virion component                                     | CDS | 92475  | 93155  | 681  | 1 | forward |
| <b>hypothetical protein CDS; transglycosylase CDS</b>                     |                | hypothetical protein; transglycosylase                                     | CDS | 116369 | 116758 | 390  | 1 | reverse |
| <b>hypothetical protein CDS; transcriptional regulator CDS</b>            |                | hypothetical protein; transcriptional regulator                            | CDS | 130464 | 130694 | 231  | 1 | reverse |
| <b>hypothetical protein CDS; tail central spike CDS</b>                   |                | hypothetical protein; tail central spike                                   | CDS | 31224  | 33776  | 2553 | 1 | forward |
| <b>hypothetical protein CDS; tail assembly chaperone CDS</b>              |                | hypothetical protein; tail assembly chaperone                              | CDS | 22669  | 23127  | 459  | 1 | forward |
| <b>hypothetical protein CDS; serine/threonine protein phosphatase CDS</b> |                | hypothetical protein; serine/threonine protein phosphatase                 | CDS | 111577 | 112284 | 708  | 1 | reverse |



|                                                                    |  |                                                            |     |        |        |      |   |         |
|--------------------------------------------------------------------|--|------------------------------------------------------------|-----|--------|--------|------|---|---------|
| hypothetical protein CDS; resolvase CDS                            |  | hypothetical protein; resolvase                            | CDS | 58898  | 59506  | 609  | 1 | forward |
| hypothetical protein CDS; receptor binding protein CDS             |  | hypothetical protein; receptor binding protein             | CDS | 46688  | 48064  | 1377 | 1 | forward |
| hypothetical protein CDS; receptor binding protein CDS             |  | hypothetical protein; receptor binding protein             | CDS | 44362  | 46284  | 1923 | 1 | forward |
| hypothetical protein CDS; putative virion component CDS            |  | hypothetical protein; putative virion component            | CDS | 128574 | 129188 | 615  | 1 | reverse |
| hypothetical protein CDS; putative transcription regulator CDS     |  | hypothetical protein; putative transcription regulator     | CDS | 91251  | 91367  | 117  | 1 | forward |
| hypothetical protein CDS; putative structural protein CDS          |  | hypothetical protein; putative structural protein          | CDS | 82883  | 83341  | 459  | 1 | forward |
| hypothetical protein CDS; putative nucleotide kinase CDS           |  | hypothetical protein; putative nucleotide kinase           | CDS | 121573 | 121989 | 417  | 1 | reverse |
| hypothetical protein CDS; putative non-cytoplasmic protein CDS     |  | hypothetical protein; putative non-cytoplasmic protein     | CDS | 129833 | 130474 | 642  | 1 | reverse |
| hypothetical protein CDS; putative non-cytoplasmic protein CDS     |  | hypothetical protein; putative non-cytoplasmic protein     | CDS | 129619 | 129810 | 192  | 1 | reverse |
| hypothetical protein CDS; putative non-cytoplasmic protein CDS     |  | hypothetical protein; putative non-cytoplasmic protein     | CDS | 124943 | 125206 | 264  | 1 | reverse |
| hypothetical protein CDS; putative non-cytoplasmic protein CDS     |  | hypothetical protein; putative non-cytoplasmic protein     | CDS | 122817 | 124865 | 2049 | 1 | reverse |
| hypothetical protein CDS; putative non-cytoplasmic protein CDS     |  | hypothetical protein; putative non-cytoplasmic protein     | CDS | 122656 | 122817 | 162  | 1 | reverse |
| hypothetical protein CDS; putative non-cytoplasmic protein CDS     |  | hypothetical protein; putative non-cytoplasmic protein     | CDS | 122424 | 122612 | 189  | 1 | reverse |
| hypothetical protein CDS; putative non-cytoplasmic protein CDS     |  | hypothetical protein; putative non-cytoplasmic protein     | CDS | 119126 | 119971 | 846  | 1 | reverse |
| hypothetical protein CDS; putative non-cytoplasmic protein CDS     |  | hypothetical protein; putative non-cytoplasmic protein     | CDS | 118145 | 118678 | 534  | 1 | reverse |
| hypothetical protein CDS; putative non-cytoplasmic protein CDS     |  | hypothetical protein; putative non-cytoplasmic protein     | CDS | 117603 | 118145 | 543  | 1 | reverse |
| hypothetical protein CDS; putative non-cytoplasmic protein CDS     |  | hypothetical protein; putative non-cytoplasmic protein     | CDS | 115212 | 115949 | 738  | 1 | reverse |
| hypothetical protein CDS; putative non-cytoplasmic protein CDS     |  | hypothetical protein; putative non-cytoplasmic protein     | CDS | 114809 | 115027 | 219  | 1 | reverse |
| hypothetical protein CDS; putative non-cytoplasmic protein CDS     |  | hypothetical protein; putative non-cytoplasmic protein     | CDS | 114257 | 114805 | 549  | 1 | reverse |
| hypothetical protein CDS; putative non-cytoplasmic protein CDS     |  | hypothetical protein; putative non-cytoplasmic protein     | CDS | 109682 | 110113 | 432  | 1 | reverse |
| hypothetical protein CDS; putative non-cytoplasmic protein CDS     |  | hypothetical protein; putative non-cytoplasmic protein     | CDS | 5335   | 5814   | 480  | 1 | forward |
| hypothetical protein CDS; putative non-cytoplasmic protein CDS     |  | hypothetical protein; putative non-cytoplasmic protein     | CDS | 2122   | 2532   | 411  | 1 | forward |
| hypothetical protein CDS; putative neck protein CDS                |  | hypothetical protein; putative neck protein                | CDS | 14325  | 15203  | 879  | 1 | forward |
| hypothetical protein CDS; putative neck protein CDS                |  | hypothetical protein; putative neck protein                | CDS | 13403  | 14311  | 909  | 1 | forward |
| hypothetical protein CDS; putative membrane-associated protein CDS |  | hypothetical protein; putative membrane-associated protein | CDS | 91357  | 91620  | 264  | 1 | forward |
| hypothetical protein CDS; putative membrane-associated protein CDS |  | hypothetical protein; putative membrane-associated protein | CDS | 85575  | 85754  | 180  | 1 | forward |
| hypothetical protein CDS; putative membrane-associated protein CDS |  | hypothetical protein; putative membrane-associated protein | CDS | 85424  | 85588  | 165  | 1 | forward |
| hypothetical protein CDS; putative HNH endonuclease CDS            |  | hypothetical protein; putative HNH endonuclease            | CDS | 131913 | 132548 | 636  | 1 | reverse |
| hypothetical protein CDS; putative endonuclease CDS                |  | hypothetical protein; putative endonuclease                | CDS | 89218  | 89820  | 603  | 1 | forward |
| hypothetical protein CDS; putative DNA repair exonuclease CDS      |  | hypothetical protein; putative DNA repair exonuclease      | CDS | 77185  | 78435  | 1251 | 1 | forward |
| hypothetical protein CDS; putative cytoplasmic protein CDS         |  | hypothetical protein; putative cytoplasmic protein         | CDS | 130697 | 130924 | 228  | 1 | reverse |
| hypothetical protein CDS; putative cytoplasmic protein CDS         |  | hypothetical protein; putative cytoplasmic protein         | CDS | 115028 | 115222 | 195  | 1 | reverse |
| hypothetical protein CDS; putative cytoplasmic protein CDS         |  | hypothetical protein; putative cytoplasmic protein         | CDS | 111182 | 111580 | 399  | 1 | reverse |
| hypothetical protein CDS; putative capsid component CDS            |  | hypothetical protein; putative capsid component            | CDS | 74668  | 75300  | 633  | 1 | forward |
| hypothetical protein CDS; putative baseplate component CDS         |  | hypothetical protein; putative baseplate component         | CDS | 46307  | 46681  | 375  | 1 | forward |
| hypothetical protein CDS; putative baseplate component CDS         |  | hypothetical protein; putative baseplate component         | CDS | 34674  | 35198  | 525  | 1 | forward |

|                                                                    |  |                                                            |     |        |        |      |   |         |
|--------------------------------------------------------------------|--|------------------------------------------------------------|-----|--------|--------|------|---|---------|
| hypothetical protein CDS; putative baseplate component CDS         |  | hypothetical protein; putative baseplate component         | CDS | 33883  | 34674  | 792  | 1 | forward |
| hypothetical protein CDS; peptidoglycan binding protein CDS        |  | hypothetical protein; peptidoglycan binding protein        | CDS | 125223 | 125396 | 174  | 1 | reverse |
| hypothetical protein CDS; nucleotidyl transferase CDS              |  | hypothetical protein; nucleotidyl transferase              | CDS | 110127 | 110669 | 543  | 1 | reverse |
| hypothetical protein CDS; nucleoside 2-deoxyribosyltransferase CDS |  | hypothetical protein; nucleoside 2-deoxyribosyltransferase | CDS | 125974 | 126600 | 627  | 1 | reverse |
| hypothetical protein CDS; major tail protein CDS                   |  | hypothetical protein; major tail protein                   | CDS | 112954 | 113271 | 318  | 1 | reverse |
| hypothetical protein CDS; baseplate hub assembly protein CDS       |  | hypothetical protein; baseplate hub assembly protein       | CDS | 15842  | 16678  | 837  | 1 | forward |
| hypothetical protein CDS; AAA family ATPase CDS                    |  | hypothetical protein; AAA family ATPase                    | CDS | 119983 | 121101 | 1119 | 1 | reverse |
| hypothetical protein CDS                                           |  | hypothetical protein                                       | CDS | 121254 | 121580 | 327  | 1 | reverse |
| hypothetical protein CDS                                           |  | hypothetical protein                                       | CDS | 117071 | 117553 | 483  | 1 | reverse |
| hypothetical protein CDS                                           |  | hypothetical protein                                       | CDS | 116857 | 117030 | 174  | 1 | reverse |
| hypothetical protein CDS                                           |  | hypothetical protein                                       | CDS | 116128 | 116376 | 249  | 1 | reverse |
| hypothetical protein CDS                                           |  | hypothetical protein                                       | CDS | 116012 | 116116 | 105  | 1 | reverse |
| hypothetical protein CDS                                           |  | hypothetical protein                                       | CDS | 112384 | 112938 | 555  | 1 | reverse |
| hypothetical protein CDS                                           |  | hypothetical protein                                       | CDS | 110681 | 111169 | 489  | 1 | reverse |
| hypothetical protein CDS                                           |  | hypothetical protein                                       | CDS | 108582 | 108752 | 171  | 1 | reverse |
| hypothetical protein CDS                                           |  | hypothetical protein                                       | CDS | 108573 | 108752 | 180  | 1 | reverse |
| hypothetical protein CDS                                           |  | hypothetical protein                                       | CDS | 99452  | 99619  | 168  | 1 | forward |
| hypothetical protein CDS                                           |  | hypothetical protein                                       | CDS | 99431  | 99619  | 189  | 1 | forward |
| hypothetical protein CDS                                           |  | hypothetical protein                                       | CDS | 99123  | 99437  | 315  | 1 | forward |
| hypothetical protein CDS                                           |  | hypothetical protein                                       | CDS | 98905  | 99099  | 195  | 1 | forward |
| hypothetical protein CDS                                           |  | hypothetical protein                                       | CDS | 98890  | 99099  | 210  | 1 | forward |
| hypothetical protein CDS                                           |  | hypothetical protein                                       | CDS | 98570  | 98899  | 330  | 1 | forward |
| hypothetical protein CDS                                           |  | hypothetical protein                                       | CDS | 98059  | 98568  | 510  | 1 | forward |
| hypothetical protein CDS                                           |  | hypothetical protein                                       | CDS | 97745  | 98056  | 312  | 1 | forward |
| hypothetical protein CDS                                           |  | hypothetical protein                                       | CDS | 97458  | 97679  | 222  | 1 | forward |
| hypothetical protein CDS                                           |  | hypothetical protein                                       | CDS | 97064  | 97456  | 393  | 1 | forward |
| hypothetical protein CDS                                           |  | hypothetical protein                                       | CDS | 96799  | 97044  | 246  | 1 | forward |
| hypothetical protein CDS                                           |  | hypothetical protein                                       | CDS | 94020  | 94328  | 309  | 1 | forward |
| hypothetical protein CDS                                           |  | hypothetical protein                                       | CDS | 93437  | 93637  | 201  | 1 | forward |
| hypothetical protein CDS                                           |  | hypothetical protein                                       | CDS | 92157  | 92474  | 318  | 1 | forward |
| hypothetical protein CDS                                           |  | hypothetical protein                                       | CDS | 91891  | 92154  | 264  | 1 | forward |
| hypothetical protein CDS                                           |  | hypothetical protein                                       | CDS | 90643  | 90936  | 294  | 1 | forward |
| hypothetical protein CDS                                           |  | hypothetical protein                                       | CDS | 90142  | 90240  | 99   | 1 | forward |
| hypothetical protein CDS                                           |  | hypothetical protein                                       | CDS | 89834  | 90013  | 180  | 1 | forward |
| hypothetical protein CDS                                           |  | hypothetical protein                                       | CDS | 88868  | 89218  | 351  | 1 | forward |
| hypothetical protein CDS                                           |  | hypothetical protein                                       | CDS | 88548  | 88853  | 306  | 1 | forward |
| hypothetical protein CDS                                           |  | hypothetical protein                                       | CDS | 87853  | 88200  | 348  | 1 | forward |
| hypothetical protein CDS                                           |  | hypothetical protein                                       | CDS | 87472  | 87840  | 369  | 1 | forward |
| hypothetical protein CDS                                           |  | hypothetical protein                                       | CDS | 86933  | 87229  | 297  | 1 | forward |
| hypothetical protein CDS                                           |  | hypothetical protein                                       | CDS | 86764  | 86940  | 177  | 1 | forward |
| hypothetical protein CDS                                           |  | hypothetical protein                                       | CDS | 85177  | 85419  | 243  | 1 | forward |
| hypothetical protein CDS                                           |  | hypothetical protein                                       | CDS | 83866  | 84570  | 705  | 1 | forward |
| hypothetical protein CDS                                           |  | hypothetical protein                                       | CDS | 83406  | 83849  | 444  | 1 | forward |
| hypothetical protein CDS                                           |  | hypothetical protein                                       | CDS | 82134  | 82865  | 732  | 1 | forward |

|                                                       |                  |                                                 |     |        |        |      |   |         |
|-------------------------------------------------------|------------------|-------------------------------------------------|-----|--------|--------|------|---|---------|
| hypothetical protein CDS                              |                  | hypothetical protein                            | CDS | 80899  | 81762  | 864  | 1 | forward |
| hypothetical protein CDS                              |                  | hypothetical protein                            | CDS | 80453  | 80899  | 447  | 1 | forward |
| hypothetical protein CDS                              |                  | hypothetical protein                            | CDS | 79708  | 80475  | 768  | 1 | forward |
| hypothetical protein CDS                              |                  | hypothetical protein                            | CDS | 79179  | 79715  | 537  | 1 | forward |
| hypothetical protein CDS                              |                  | hypothetical protein                            | CDS | 78804  | 79115  | 312  | 1 | forward |
| hypothetical protein CDS                              |                  | hypothetical protein                            | CDS | 76437  | 77192  | 756  | 1 | forward |
| hypothetical protein CDS                              |                  | hypothetical protein                            | CDS | 76173  | 76433  | 261  | 1 | forward |
| hypothetical protein CDS                              |                  | hypothetical protein                            | CDS | 73538  | 73891  | 354  | 1 | forward |
| hypothetical protein CDS                              |                  | hypothetical protein                            | CDS | 70947  | 72218  | 1272 | 1 | forward |
| hypothetical protein CDS                              |                  | hypothetical protein                            | CDS | 70378  | 70860  | 483  | 1 | forward |
| hypothetical protein CDS                              |                  | hypothetical protein                            | CDS | 70119  | 70361  | 243  | 1 | forward |
| hypothetical protein CDS                              |                  | hypothetical protein                            | CDS | 64001  | 64561  | 561  | 1 | forward |
| hypothetical protein CDS                              |                  | hypothetical protein                            | CDS | 63965  | 64561  | 597  | 1 | forward |
| hypothetical protein CDS                              |                  | hypothetical protein                            | CDS | 63125  | 63454  | 330  | 1 | forward |
| hypothetical protein CDS                              |                  | hypothetical protein                            | CDS | 58459  | 58911  | 453  | 1 | forward |
| hypothetical protein CDS                              |                  | hypothetical protein                            | CDS | 58121  | 58459  | 339  | 1 | forward |
| hypothetical protein CDS                              |                  | hypothetical protein                            | CDS | 54080  | 54457  | 378  | 1 | forward |
| hypothetical protein CDS                              |                  | hypothetical protein                            | CDS | 49916  | 51529  | 1614 | 1 | forward |
| hypothetical protein CDS                              |                  | hypothetical protein                            | CDS | 44203  | 44361  | 159  | 1 | forward |
| hypothetical protein CDS                              |                  | hypothetical protein                            | CDS | 22226  | 22537  | 312  | 1 | forward |
| hypothetical protein CDS                              |                  | hypothetical protein                            | CDS | 21479  | 21937  | 459  | 1 | forward |
| hypothetical protein CDS                              |                  | hypothetical protein                            | CDS | 21296  | 21436  | 141  | 1 | forward |
| hypothetical protein CDS                              |                  | hypothetical protein                            | CDS | 16680  | 16895  | 216  | 1 | forward |
| hypothetical protein CDS                              |                  | hypothetical protein                            | CDS | 15203  | 15823  | 621  | 1 | forward |
| hypothetical protein CDS                              |                  | hypothetical protein                            | CDS | 13094  | 13390  | 297  | 1 | forward |
| hypothetical protein CDS                              |                  | hypothetical protein                            | CDS | 10545  | 11495  | 951  | 1 | forward |
| hypothetical protein CDS                              |                  | hypothetical protein                            | CDS | 7493   | 7864   | 372  | 1 | forward |
| hypothetical protein CDS                              |                  | hypothetical protein                            | CDS | 5156   | 5338   | 183  | 1 | forward |
| hypothetical protein CDS                              |                  | hypothetical protein                            | CDS | 4357   | 5178   | 822  | 1 | forward |
| holA CDS; holin CDS                                   | holA             | HolA; holin                                     | CDS | 136190 | 136693 | 504  | 1 | reverse |
| HNH homing endonuclease CDS; treM CDS                 | treM             | HNH homing endonuclease; TreM                   | CDS | 105024 | 105512 | 489  | 1 | reverse |
| HNH homing endonuclease CDS; I-KsaIII CDS; ksaIII CDS | I-KsaIII; ksaIII | HNH homing endonuclease; HnhC; KsaIII; I-KsaIII | CDS | 68147  | 68956  | 810  | 1 | forward |
| HNH endonuclease CDS; ksaI CDS                        | ksaI             | HNH endonuclease; KsaI                          | CDS | 134727 | 135227 | 501  | 1 | reverse |
| hmzG CDS; putative NTP pyrophosphohydrolase CDS       | hmzG             | HmzG; putative NTP pyrophosphohydrolase         | CDS | 122122 | 122424 | 303  | 1 | reverse |
| DUF1024 domain protein CDS                            |                  | DUF1024 domain protein                          | CDS | 108759 | 109013 | 255  | 1 | reverse |
| DNA polymerase I CDS                                  |                  | DNA polymerase I                                | CDS | 64952  | 70050  | 3219 | 3 | forward |
| DNA helicase CDS; dhIB CDS                            | dhIB             | DNA helicase; DhIB                              | CDS | 51522  | 52964  | 1443 | 1 | forward |
| DNA helicase CDS; dhIA CDS                            | dhIA             | DNA helicase; DhIA                              | CDS | 48156  | 49904  | 1749 | 1 | forward |
| dmd CDS; putative cytoplasmic protein CDS             | dmd              | Dmd; putative cytoplasmic protein               | CDS | 1847   | 2125   | 279  | 1 | forward |
| dmcB CDS; virion component CDS                        | dmcB             | DmcB; virion component                          | CDS | 150    | 359    | 210  | 1 | reverse |
| dmcA CDS; putative membrane-associated protein CDS    | dmcA             | DmcA; putative membrane-associated protein      | CDS | 372    | 704    | 333  | 1 | reverse |
| bofR CDS                                              | bofR             | BofR                                            | CDS | 99656  | 99757  | 102  | 1 | forward |
| bofL CDS; putative non-cytoplasmic protein CDS        | bofL             | BofL; putative non-cytoplasmic protein          | CDS | 108346 | 108582 | 237  | 1 | reverse |
| baseplate protein CDS; bmpC CDS                       | bmpC             | BmpC; baseplate protein                         | CDS | 40154  | 40675  | 522  | 1 | forward |

|                                              |      |                               |     |       |       |      |   |         |
|----------------------------------------------|------|-------------------------------|-----|-------|-------|------|---|---------|
| <b>baseplate component CDS; bmpB CDS</b>     | bmpB | BmpB; baseplate component     | CDS | 35917 | 36963 | 1047 | 1 | forward |
| <b>baseplate wedge subunit CDS; bmpA CDS</b> | bmpA | BmpA; baseplate wedge subunit | CDS | 35198 | 35902 | 705  | 1 | forward |
| <b>anti-sigma factor CDS; asf CDS</b>        | asf  | Asf; anti-sigma factor        | CDS | 56376 | 56972 | 597  | 1 | forward |
